# Supplementary material for: Integrated microfluidic approach for quantitative high-throughput measurements of transcription factor binding affinities
Source: PubMed Central journal article supplement (PMC4824076; doi:10.1093/nar/gkv1327), 2015-12-03
Supplement: supp_gkv1327_nar-00752-met-k-2015-File003.pdf [file supp_gkv1327_nar-00752-met-k-2015-File003.pdf]

## Supplementary Figures

# Integrated Microfluidic Approach For Quantitative High-Throughput Measurements Of Transcription Factor Binding Affinities

Yair Glick<sup>1,4</sup>, Yaron Orenstein<sup>2,4</sup>, Dana Chen<sup>1</sup>, Dorit Avrahami<sup>1</sup>, Tsaffrir Zor<sup>3</sup>, Ron Shamir<sup>2</sup>,  
Doron Gerber<sup>1\*</sup>

Mina and Evrard Goodman life science faculty, Bar Ilan University, Ramat-Gan, 5290002, Israel

Blavatnik School of Computer Science, Tel-Aviv University, Tel-Aviv, 69978, Israel

Department of Biochemistry & Molecular Biology, Life Sciences Institute, Tel-Aviv University, Tel-Aviv, 69978, Israel

The authors contributed equally to this work.

\* To whom correspondence should be addressed.

Tel: +972 3 7384508; Fax: +942 3 7384196; Email: [Doron.Gerber@biu.ac.il](mailto:Doron.Gerber@biu.ac.il)

Fig. S1

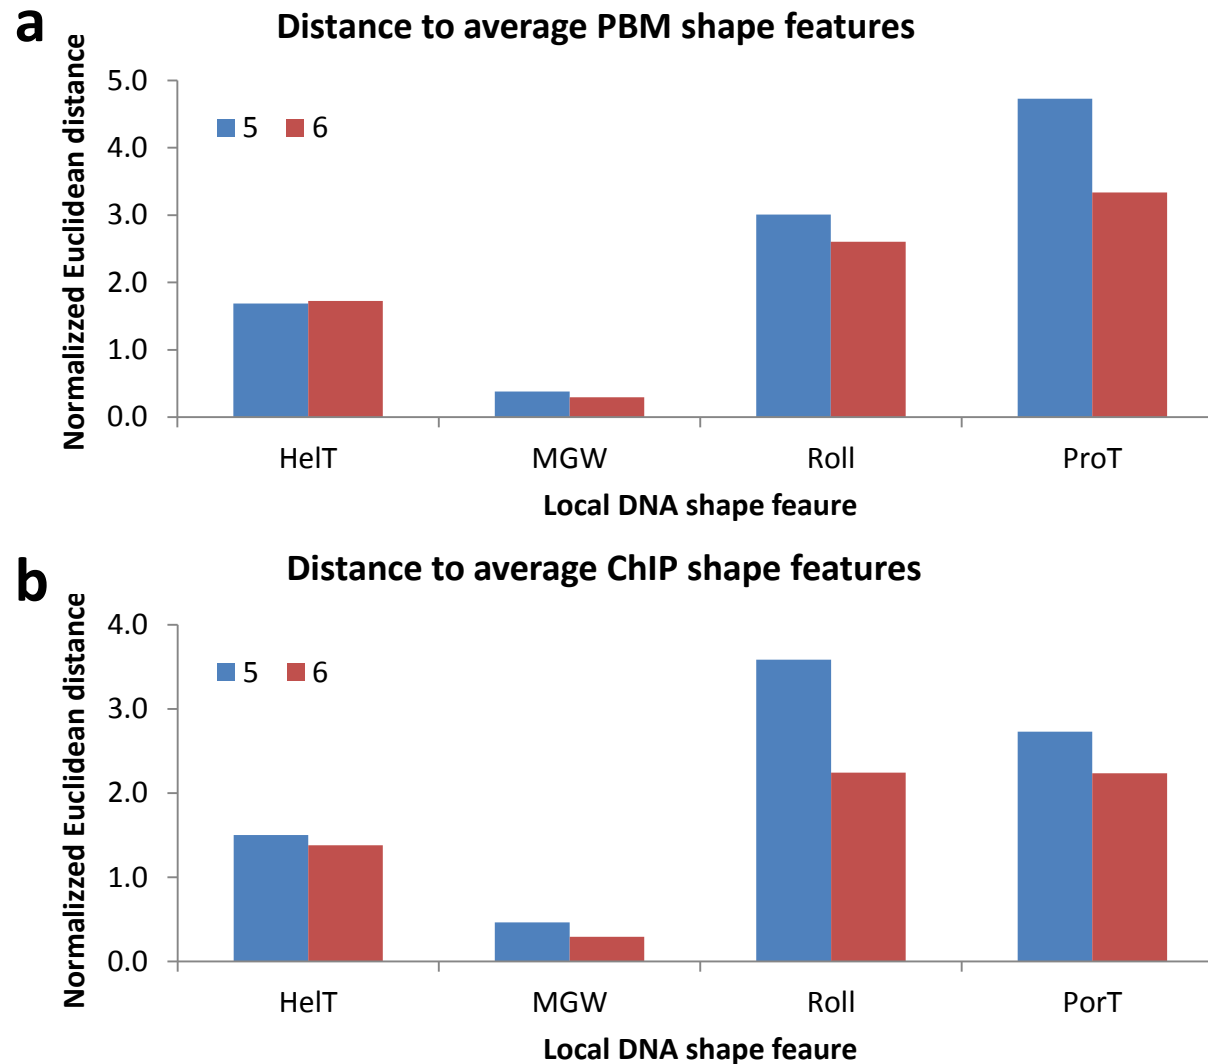

**Figure S1 - Similarity of QPID ATF1 binding preferences to PBM and ChIP-seq.** Normalized Euclidean distances were calculated between DNA local shape feature predictions of QPID oligonucleotides 5 and 6 and average shape feature predictions of CRE half-sites binding sites (TGACG) (see Methods). **(a)** Distance to an average of 1619 BSs measured by PBM. **(b)** Distance to an average of 7545 BSs measured by ChIP-seq. HelT: helix twist, MGW: minor groove width, ProT: propeller twist.

Fig. S2

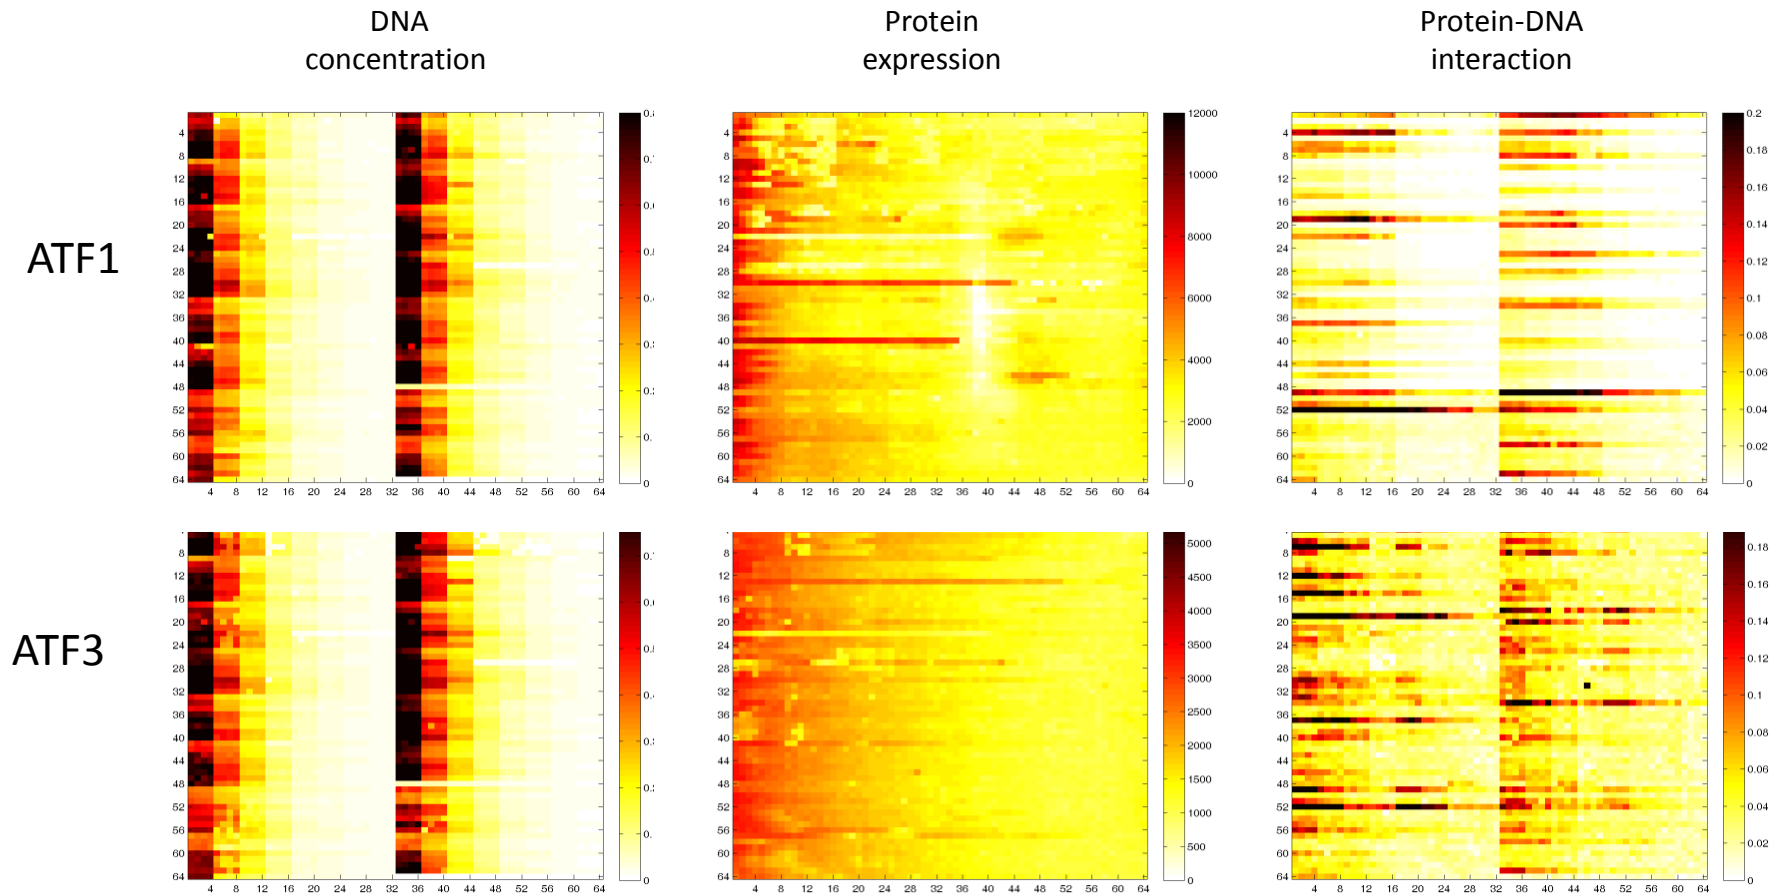

**Figure S2 - Heat maps of ATF1 and ATF3 QPID analysis.** DNA concentration ( $\mu\text{M}$ ) in solution for the various oligonucleotides is shown on the left panel. Protein signals are shown in the middle panel (fluorescent intensity, arbitrary units). DNA binding to the protein complexes is shown in the right panel.

## Supplementary Figure S3

**Figure S3 - ATF1 Quantitative analysis Kd's.** Affinity measurements between ATF1 and CRE sequences. We programmed the QPID device with different genomic CRE sequences. ATF1 was immobilized to the device surface, flooding DNA chambers solubilized spotted DNA, allowing ATF1 and DNA to interact. Protein expression levels (Cy3) and interacting DNA signals (Cy5) were measured. Interaction ratio –  $Cy5/Cy3$

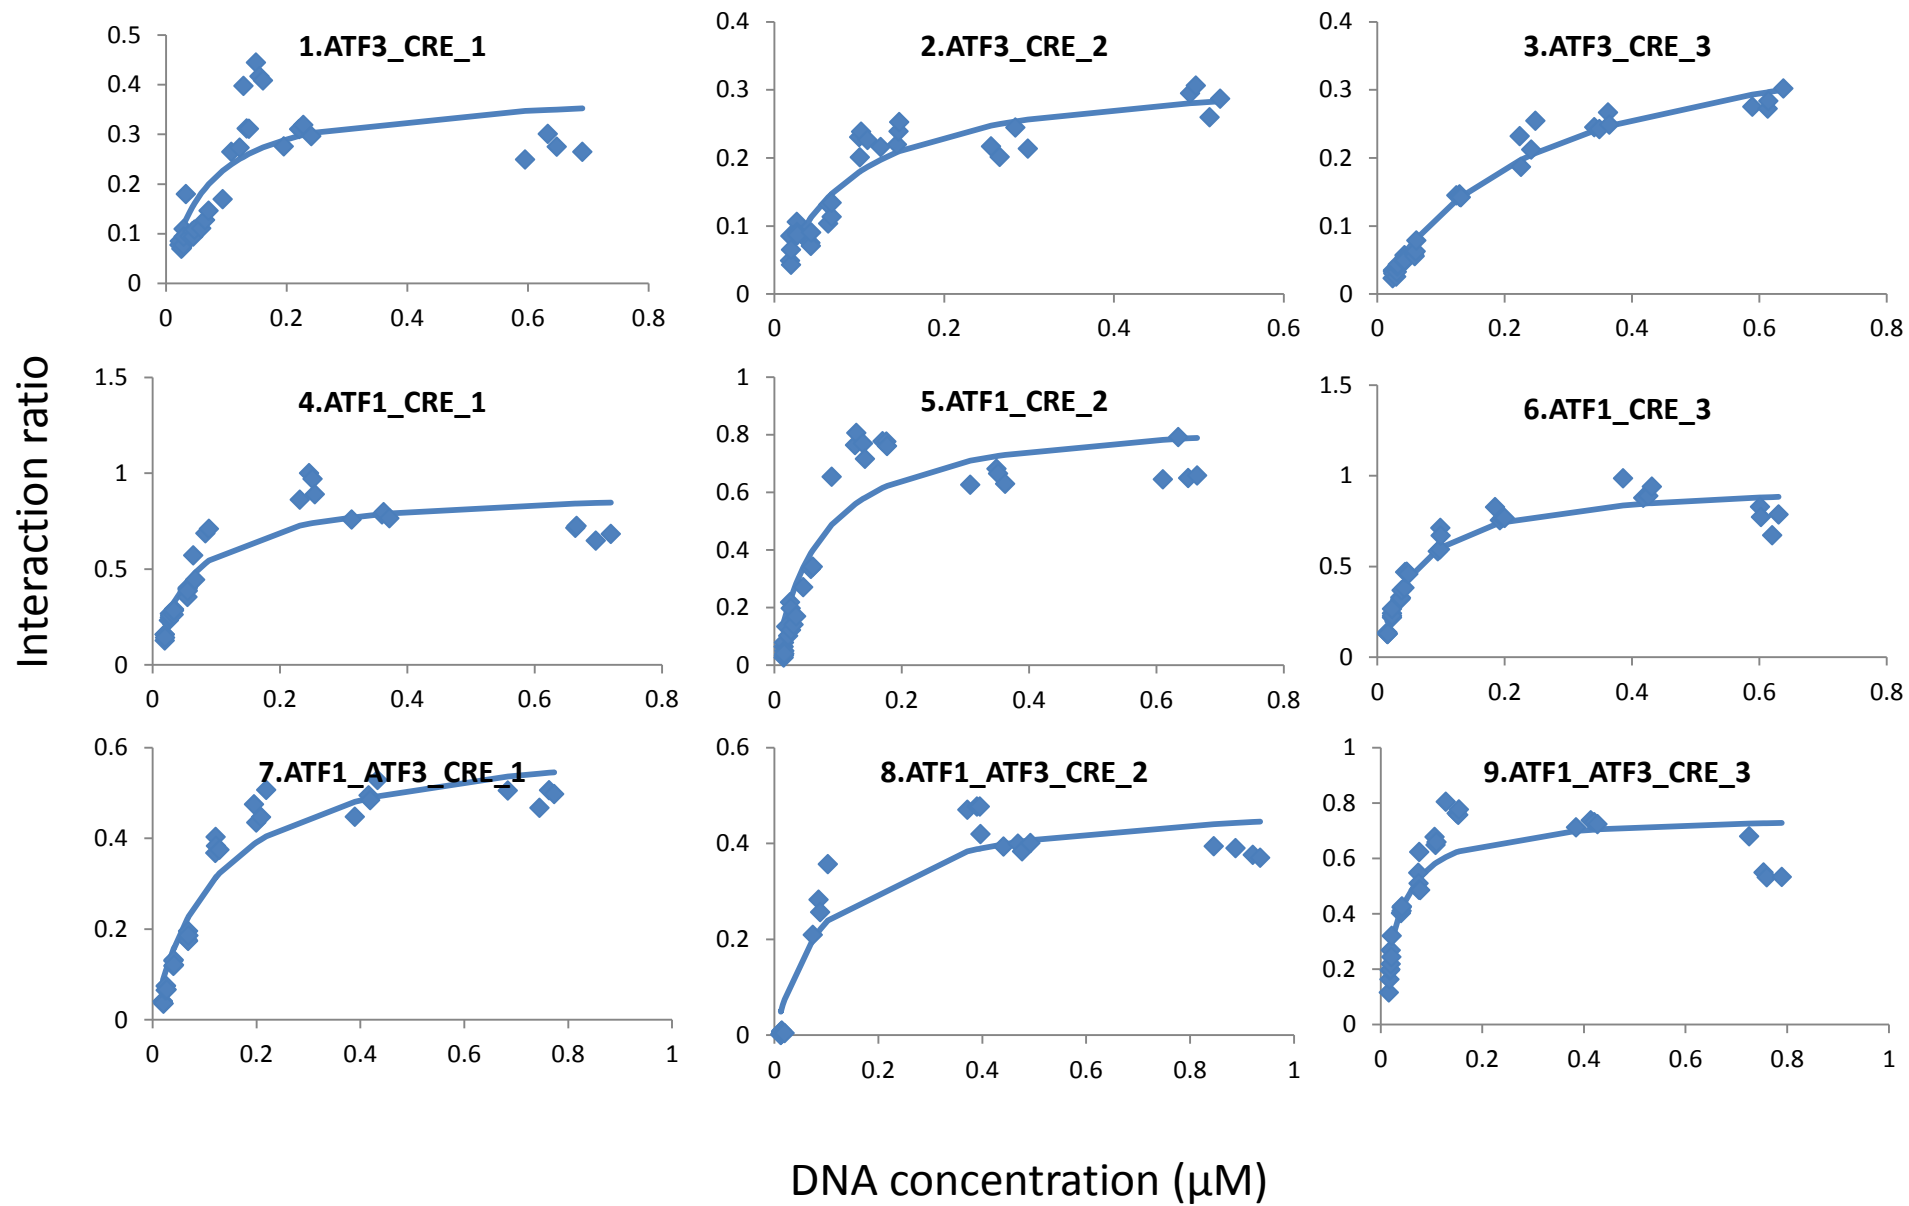

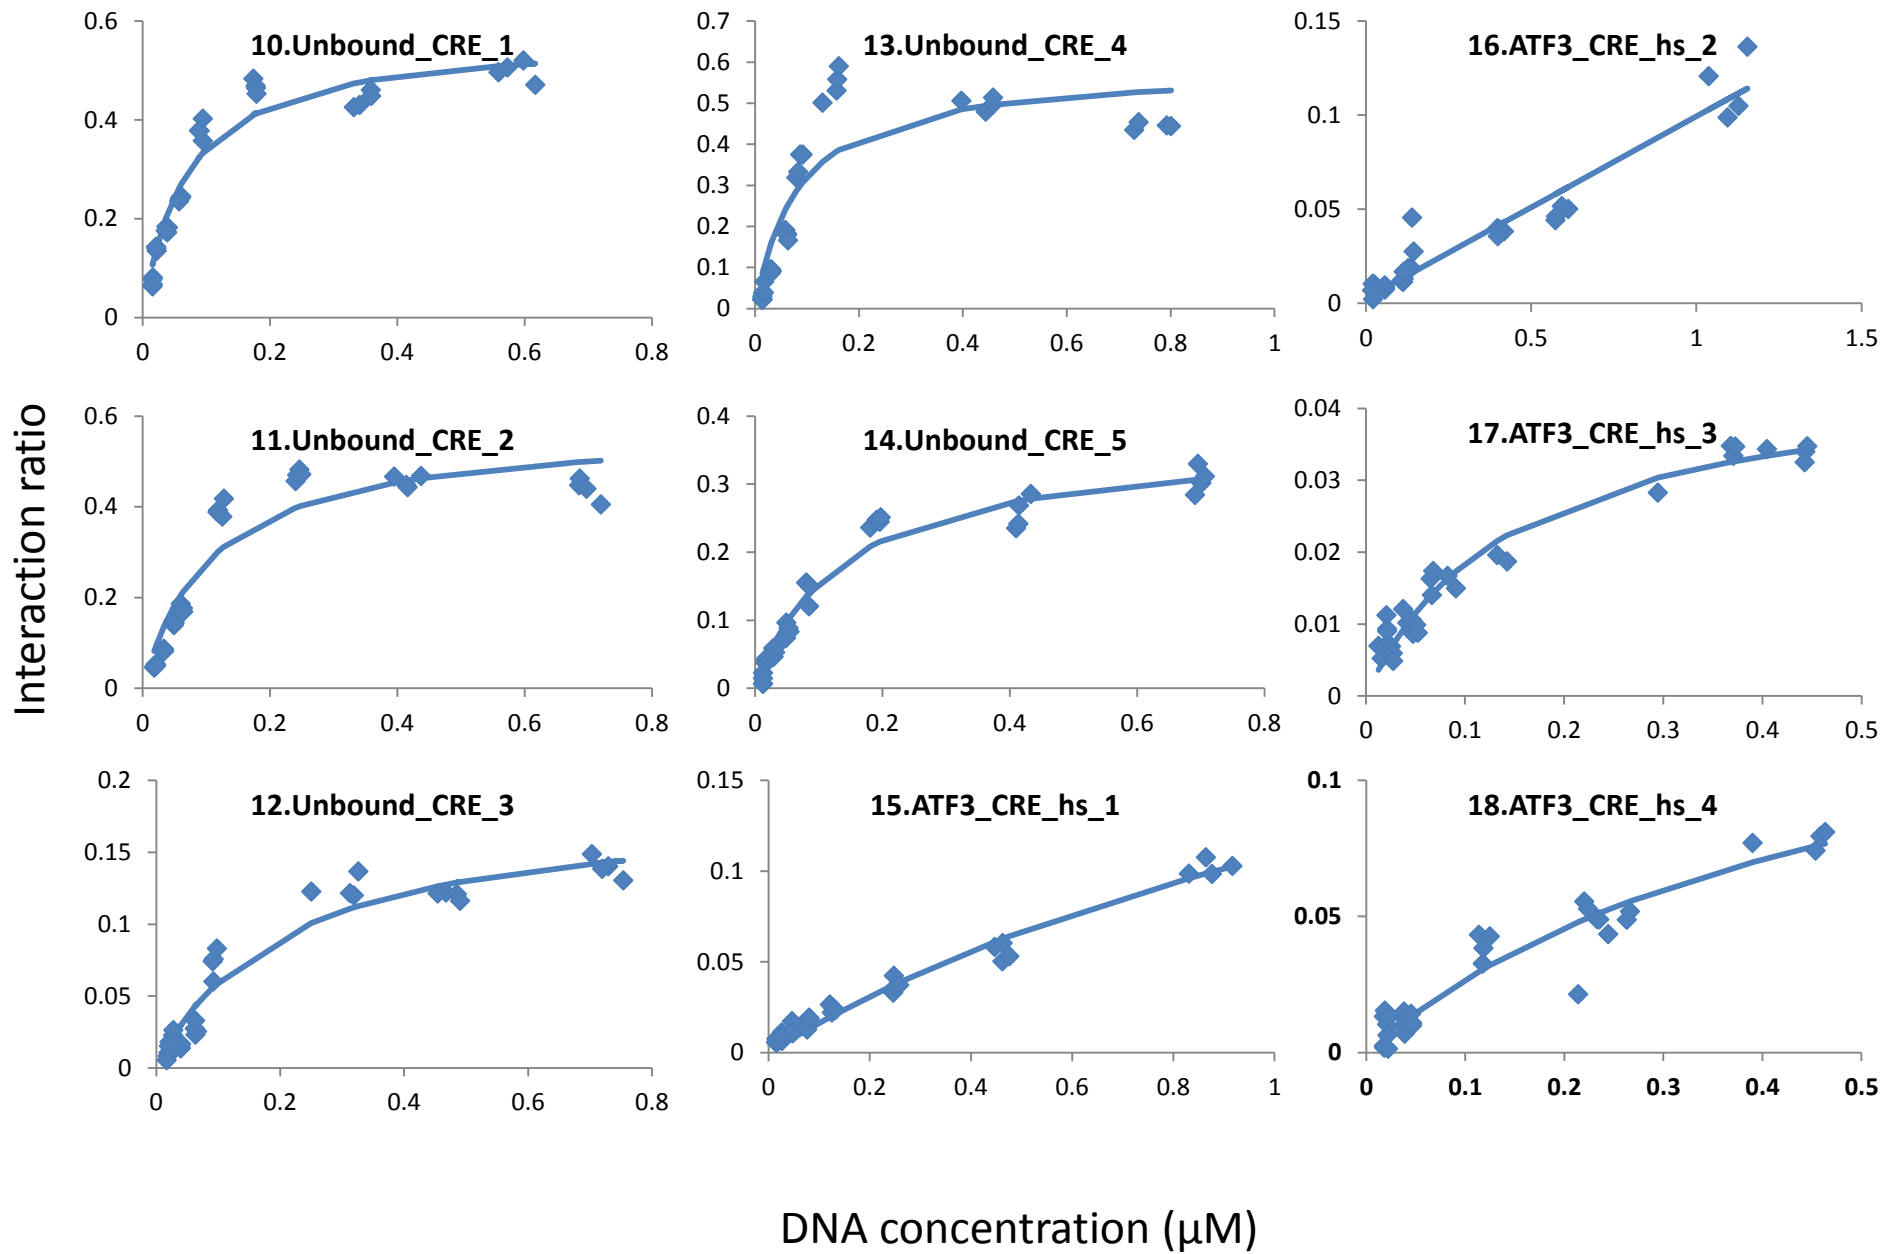

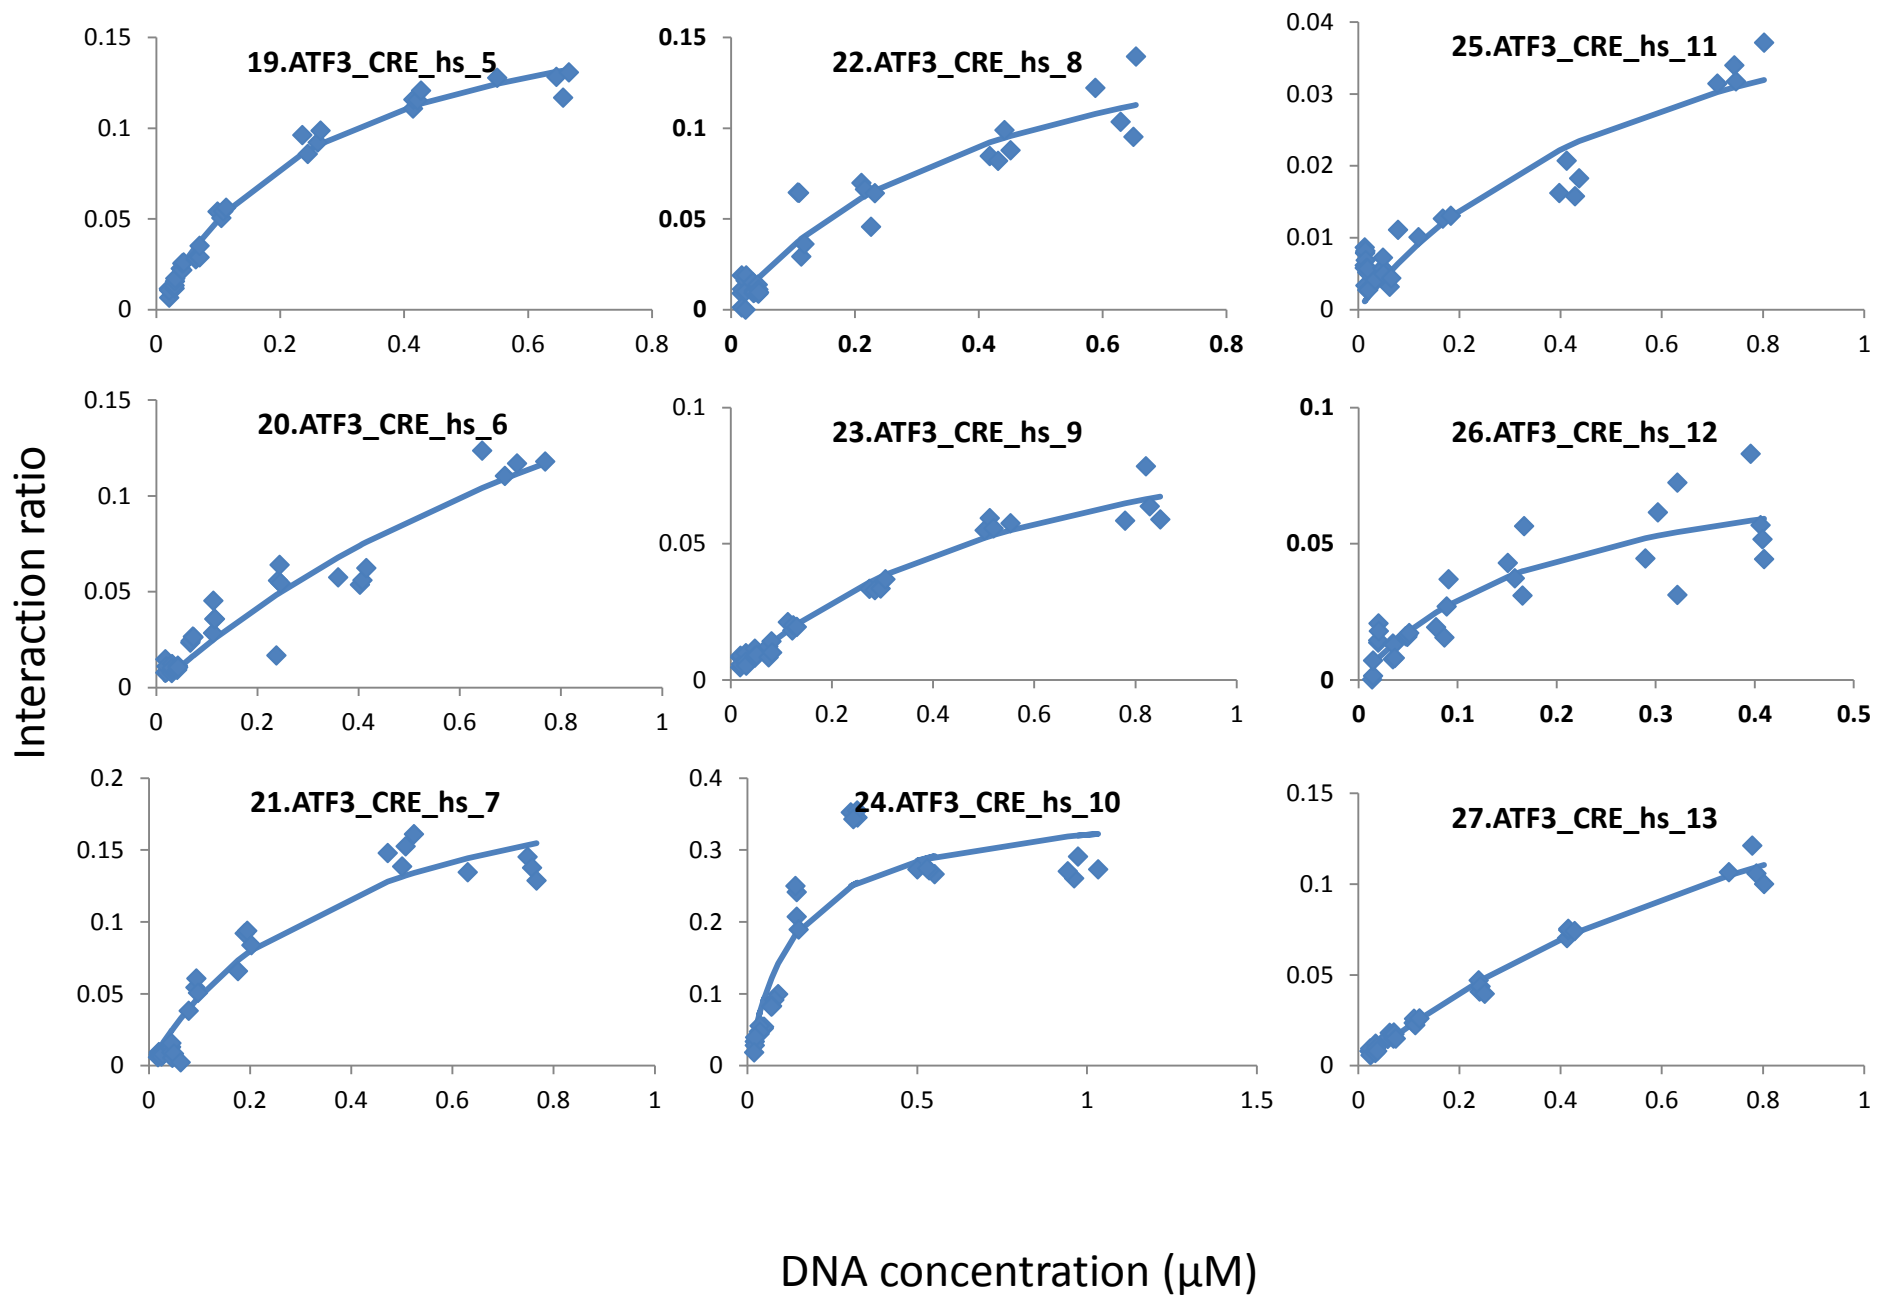

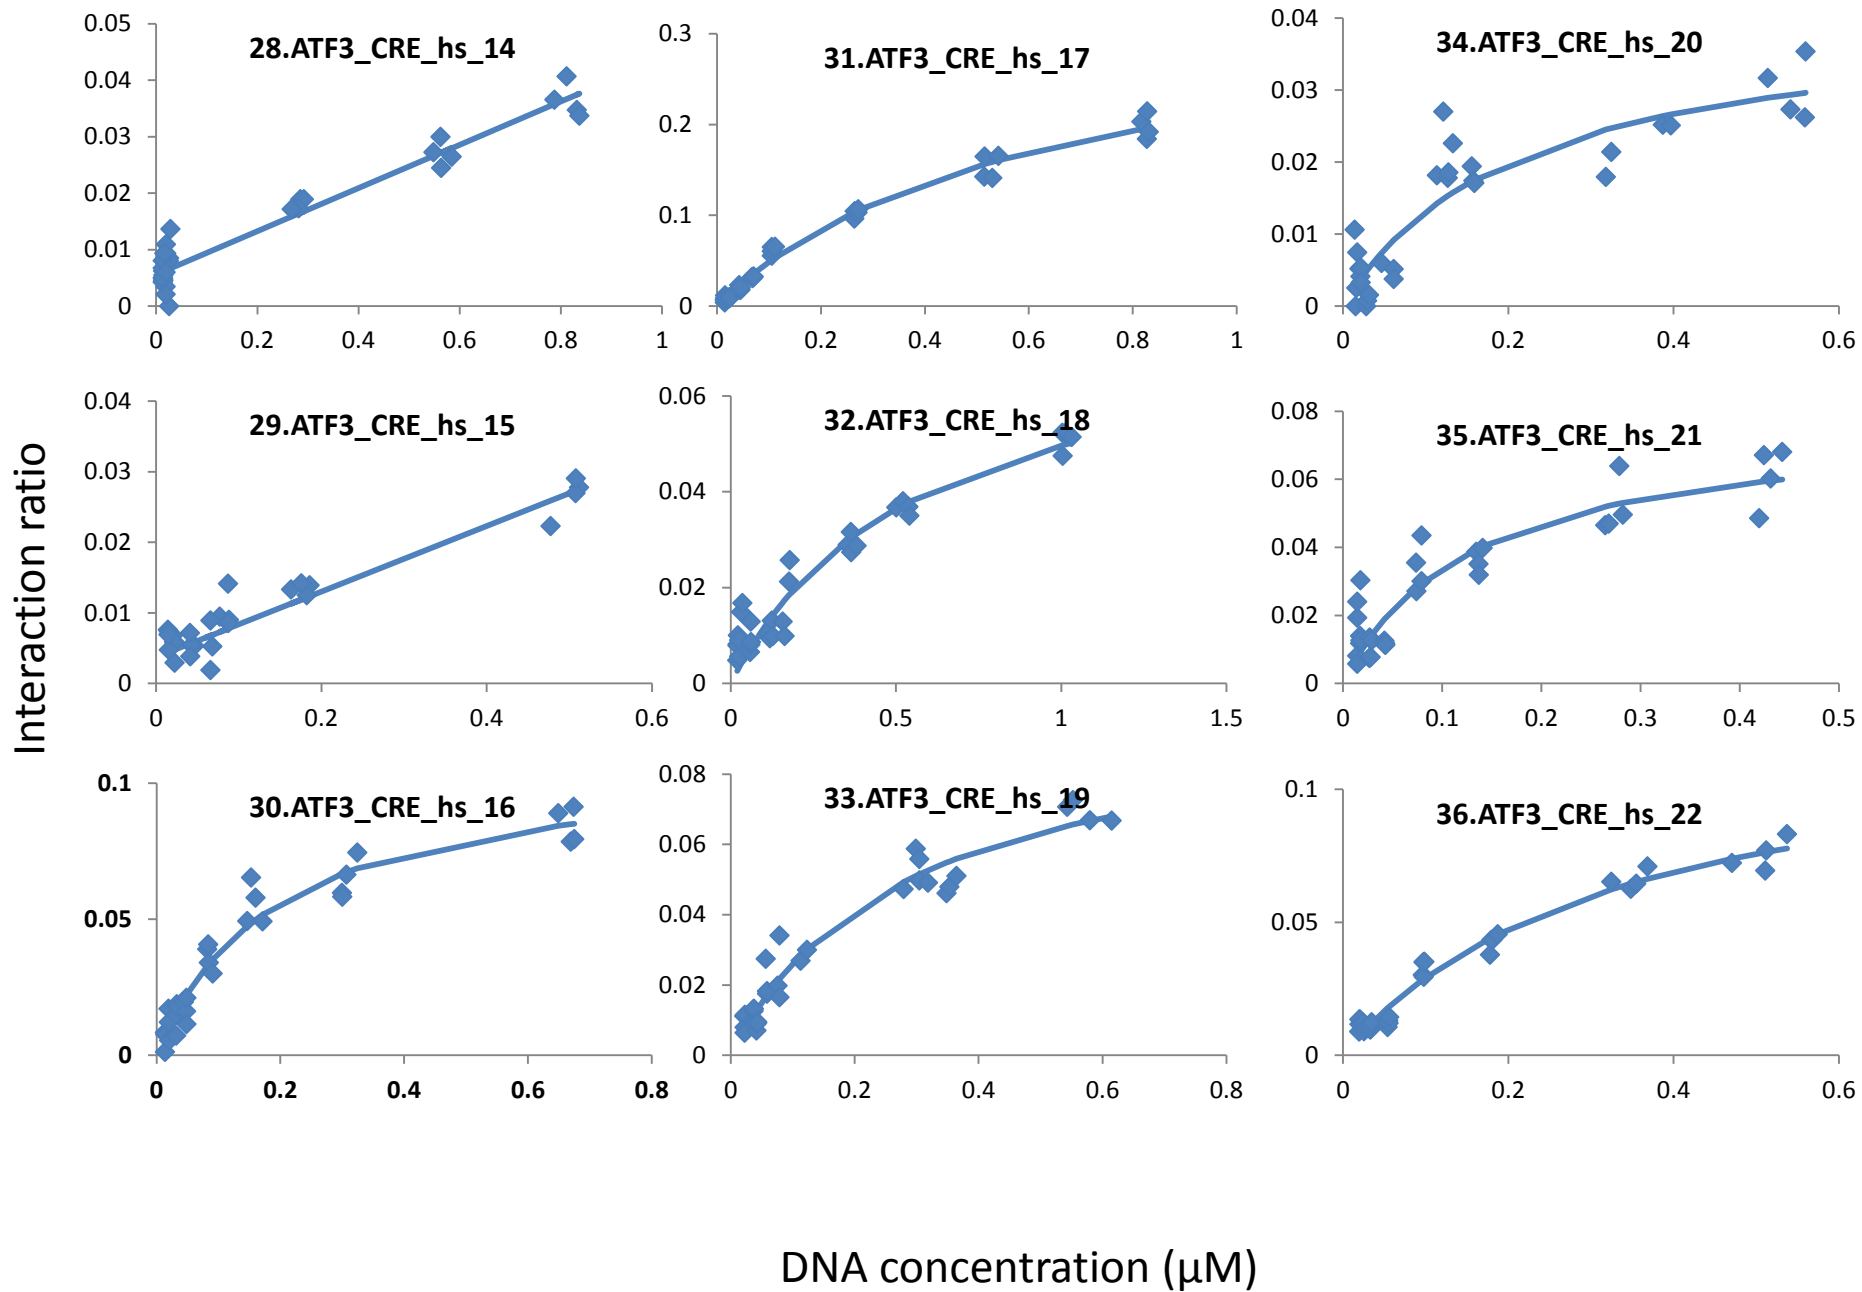



Interaction ratio

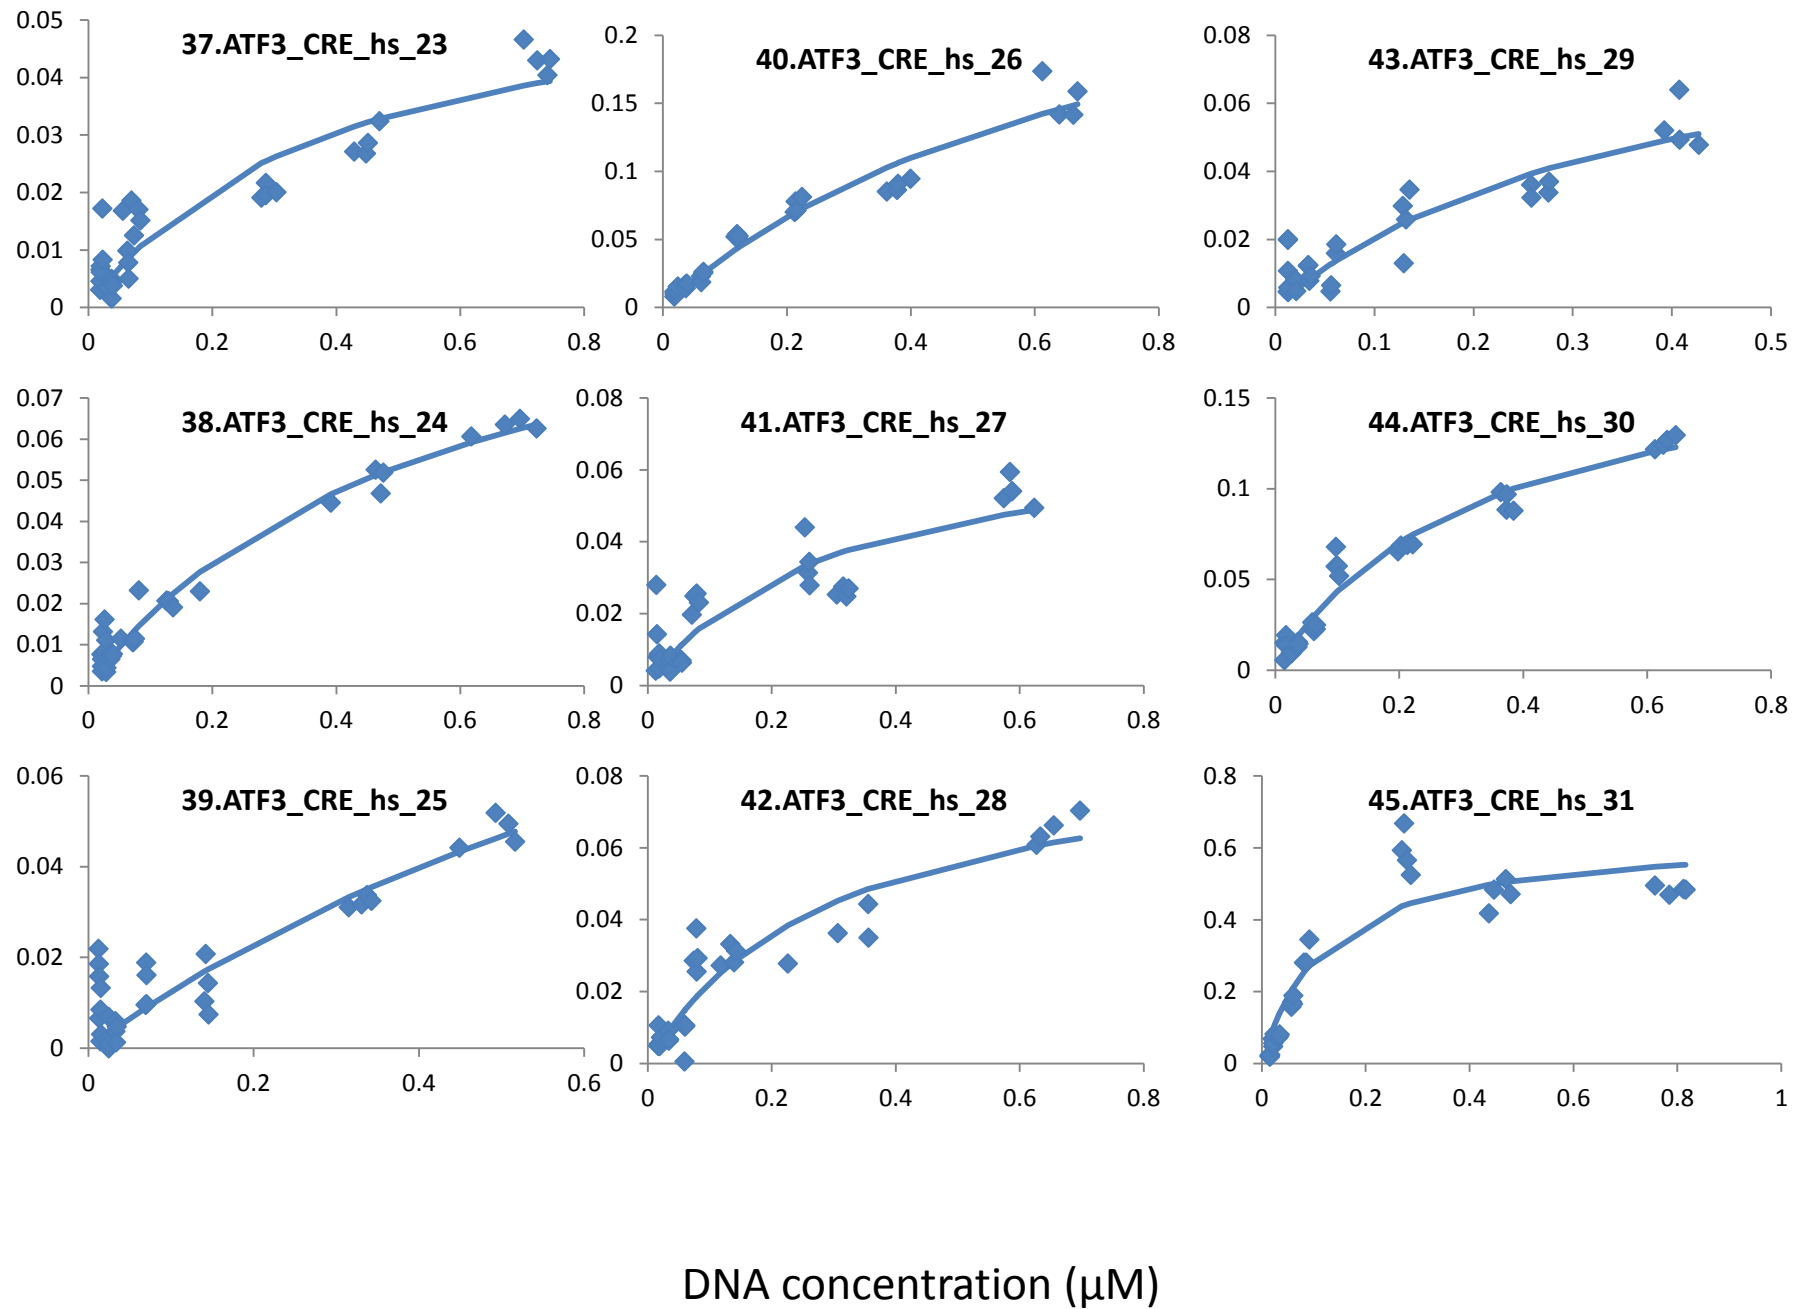

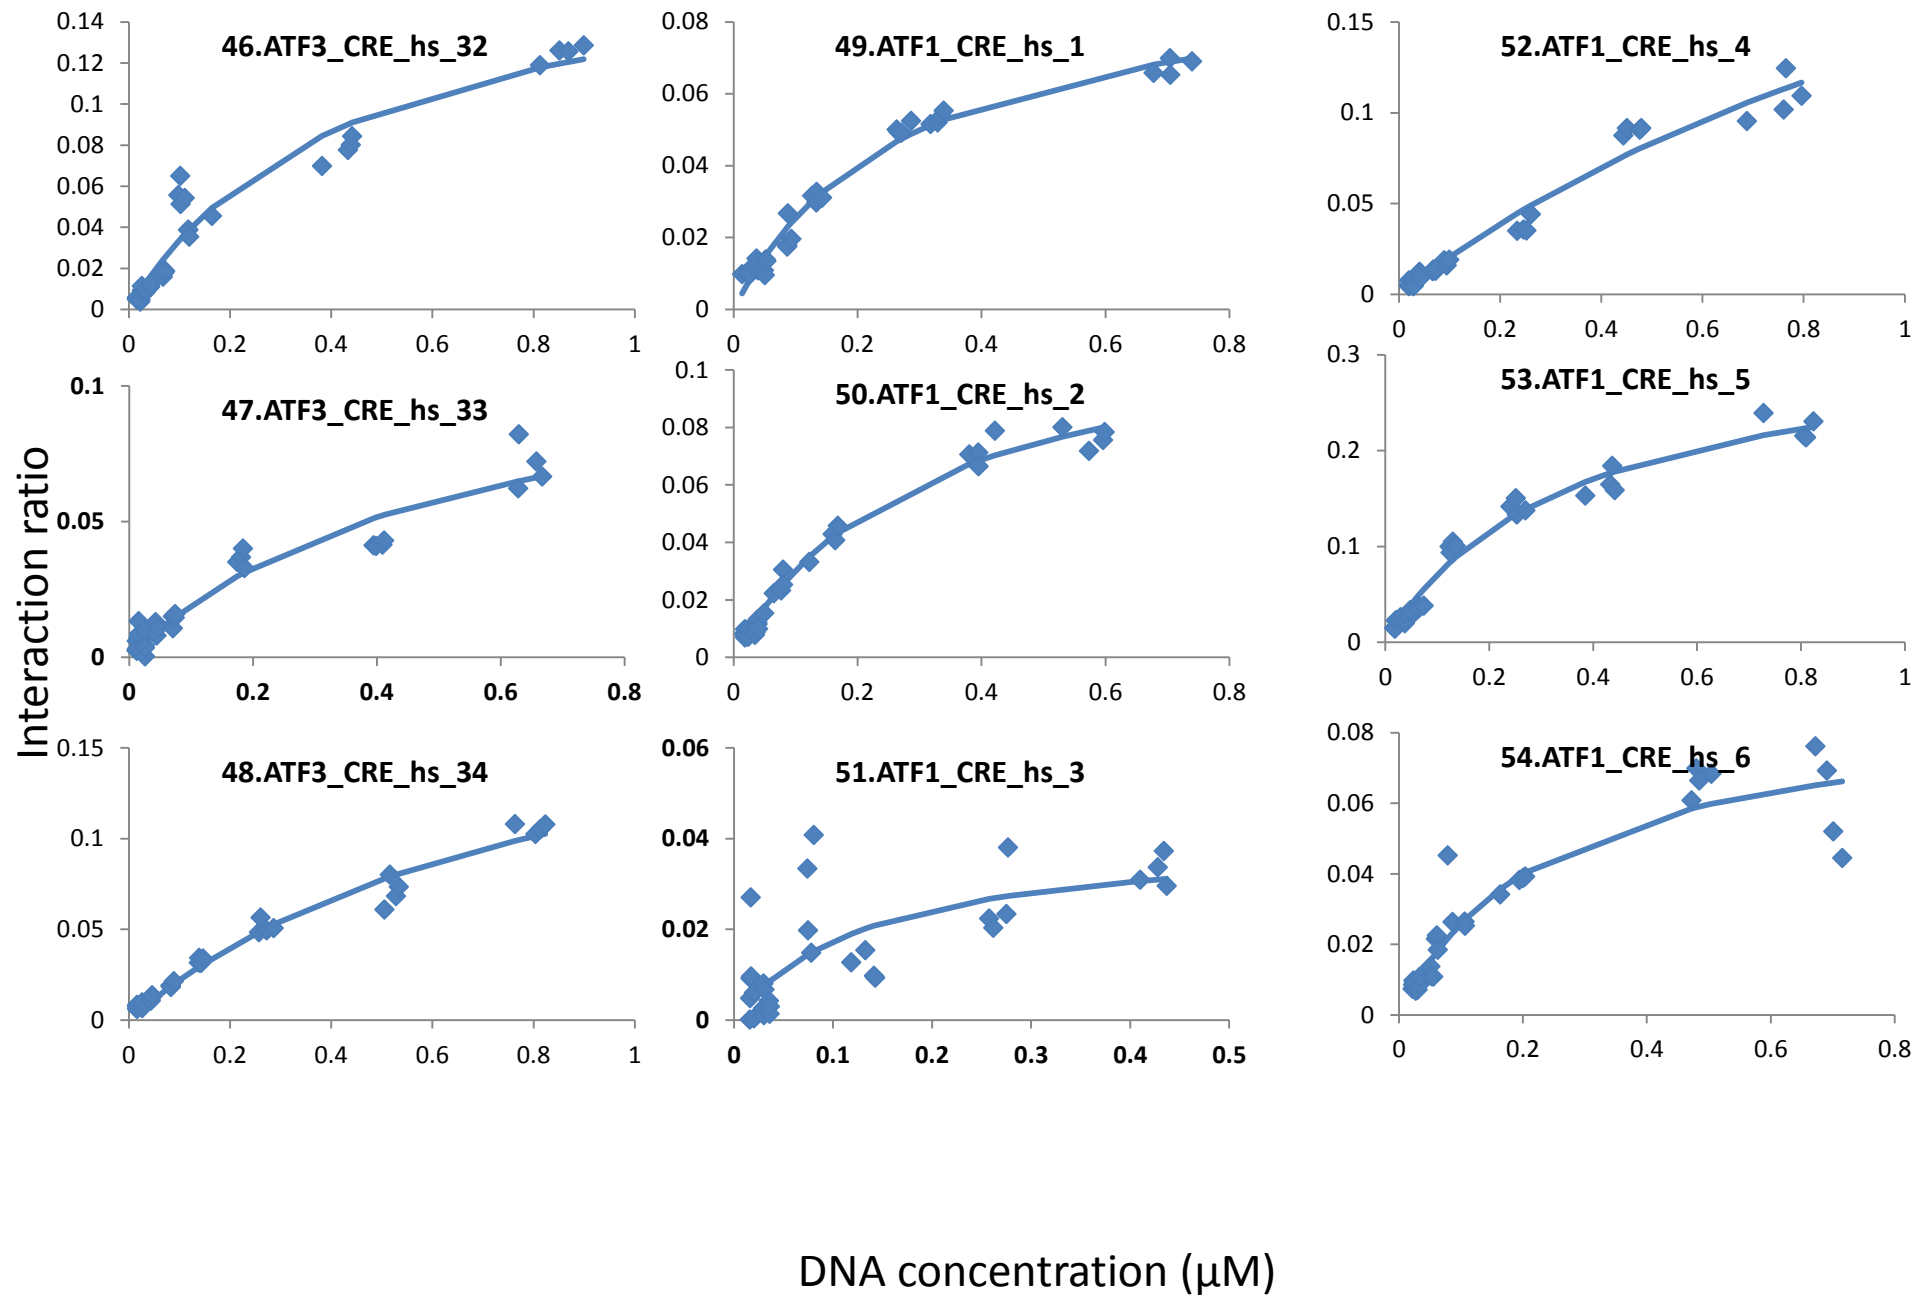

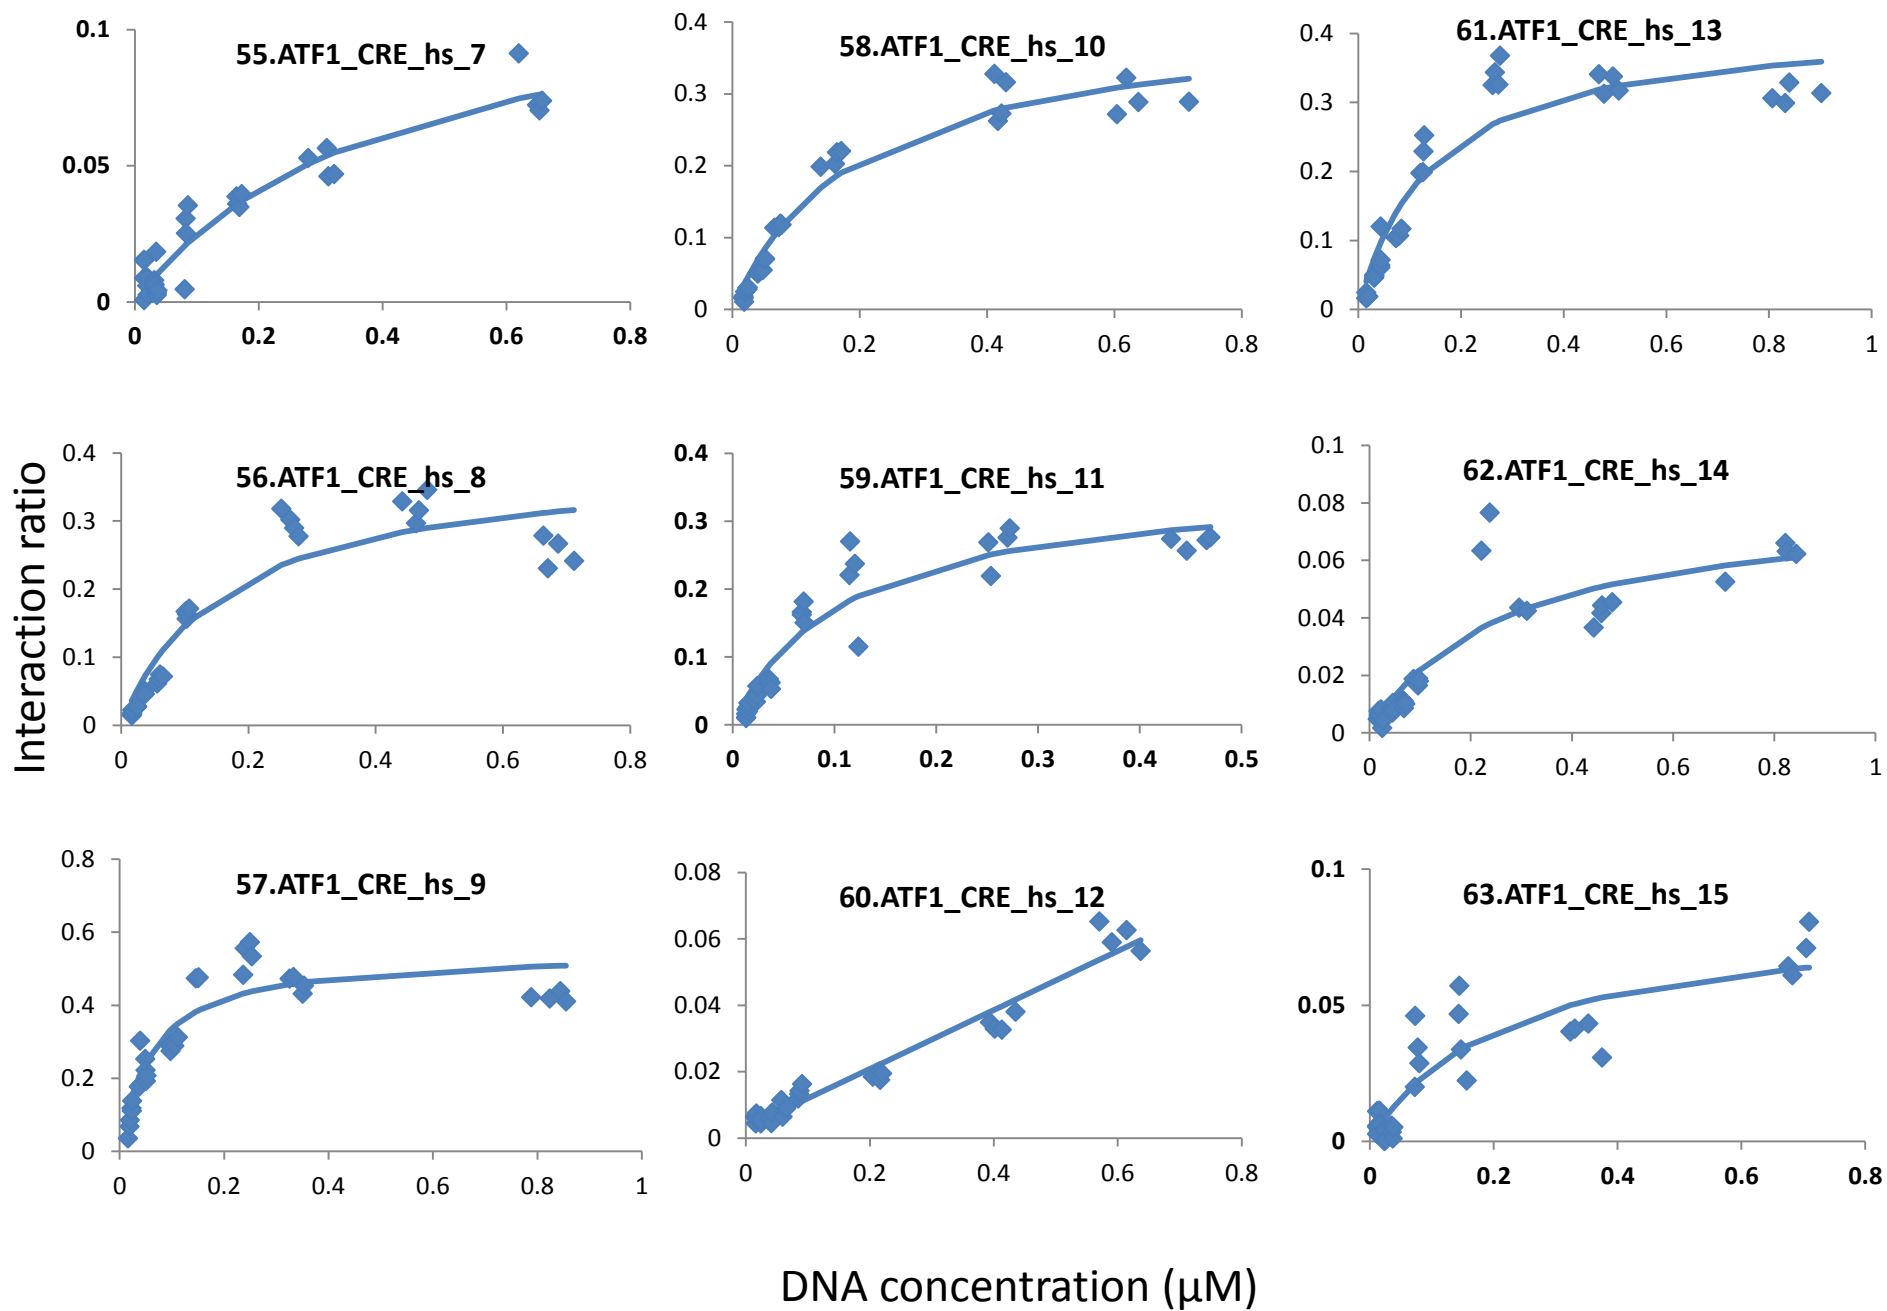

Interaction ratio

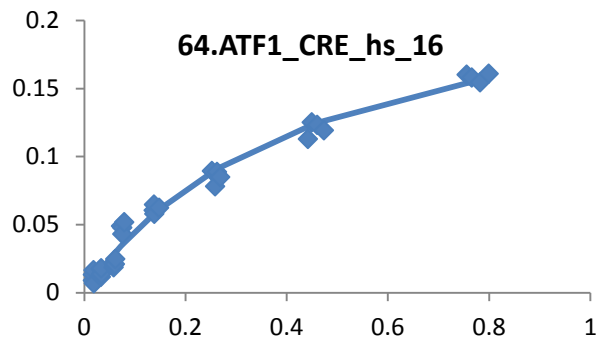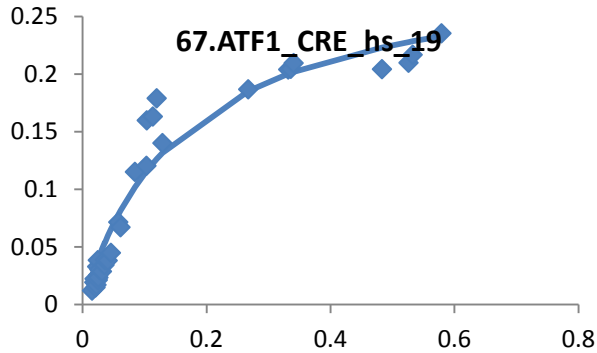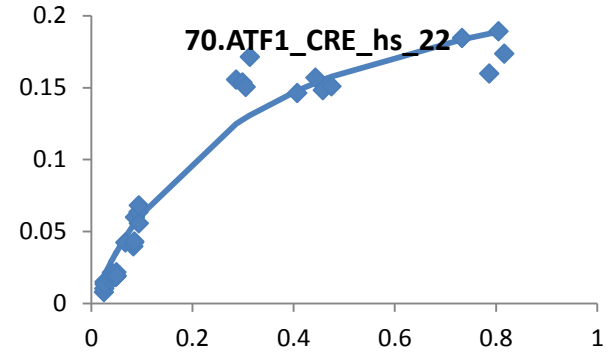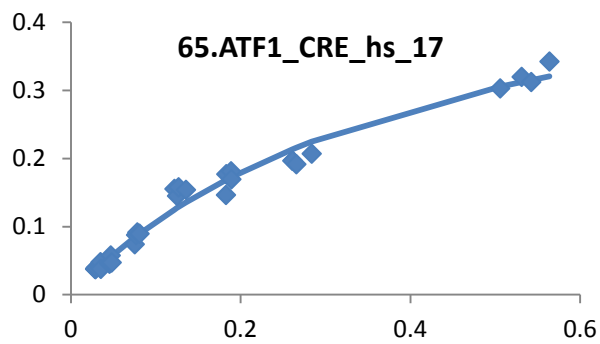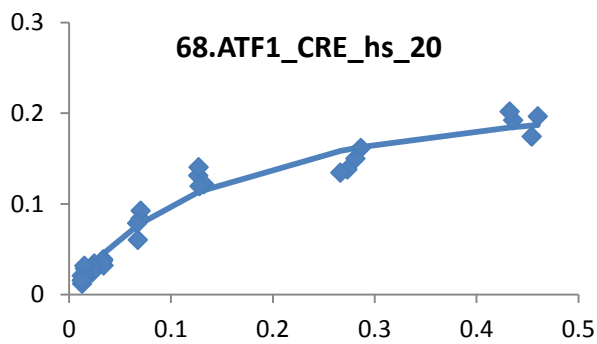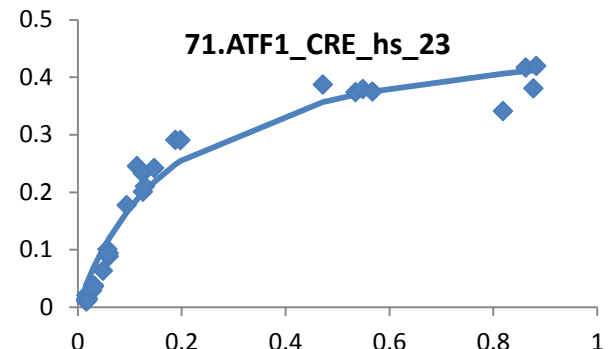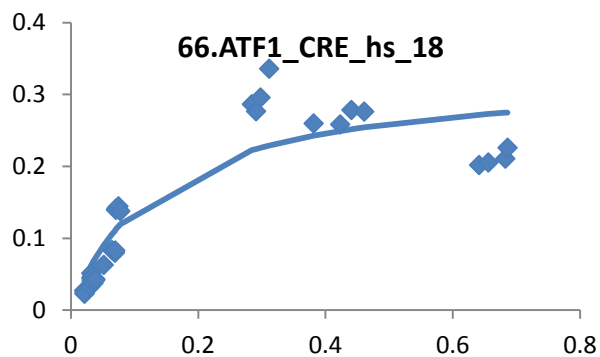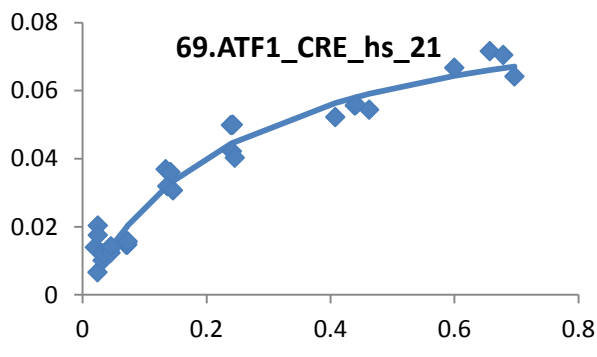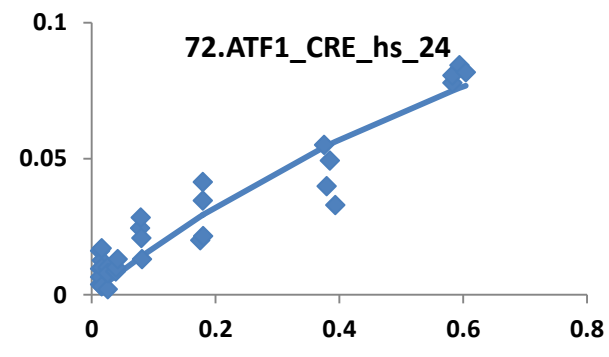

DNA concentration ( $\mu\text{M}$ )

Interaction ratio

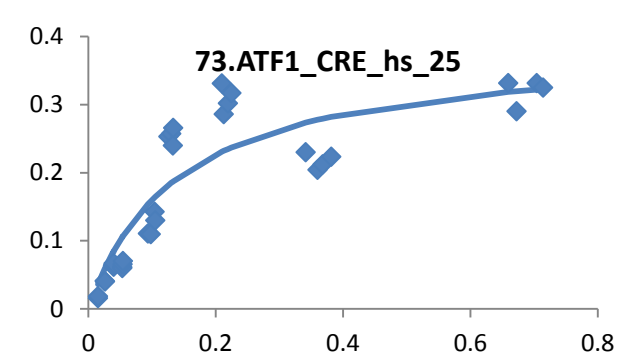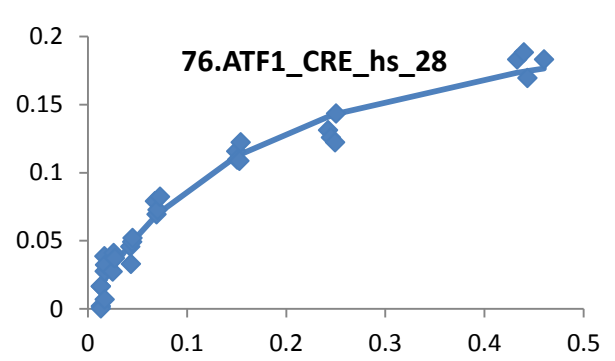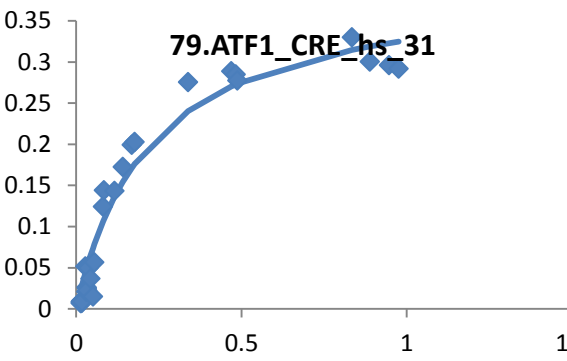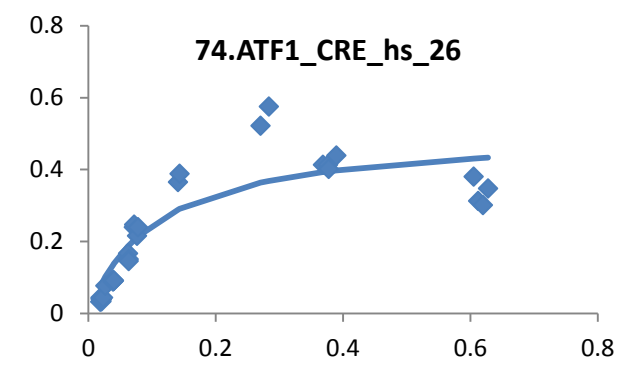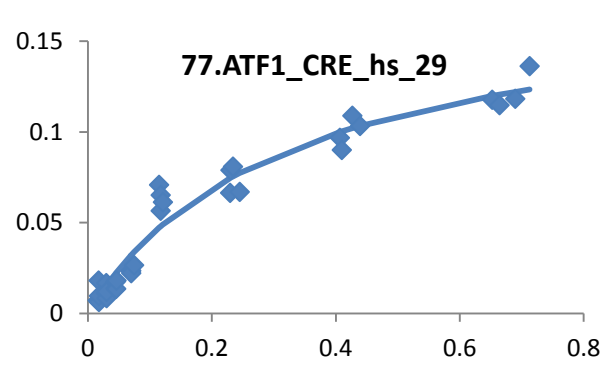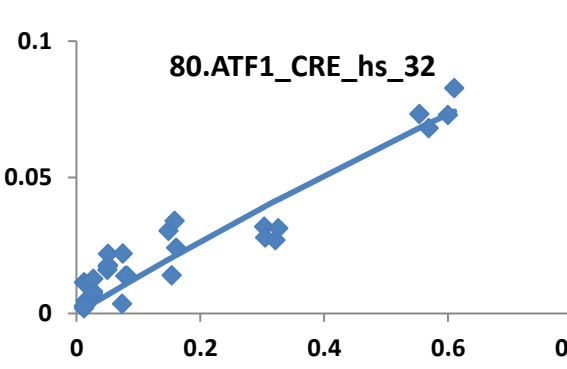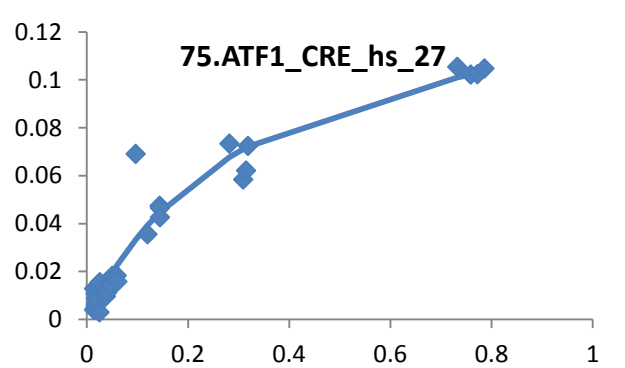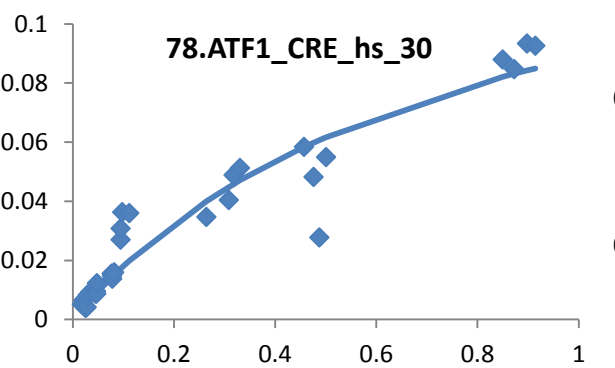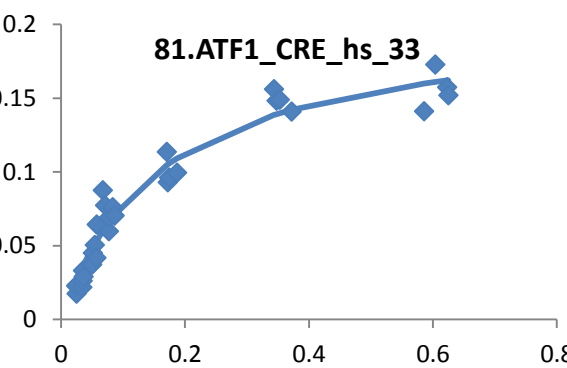

DNA concentration ( $\mu$ M)

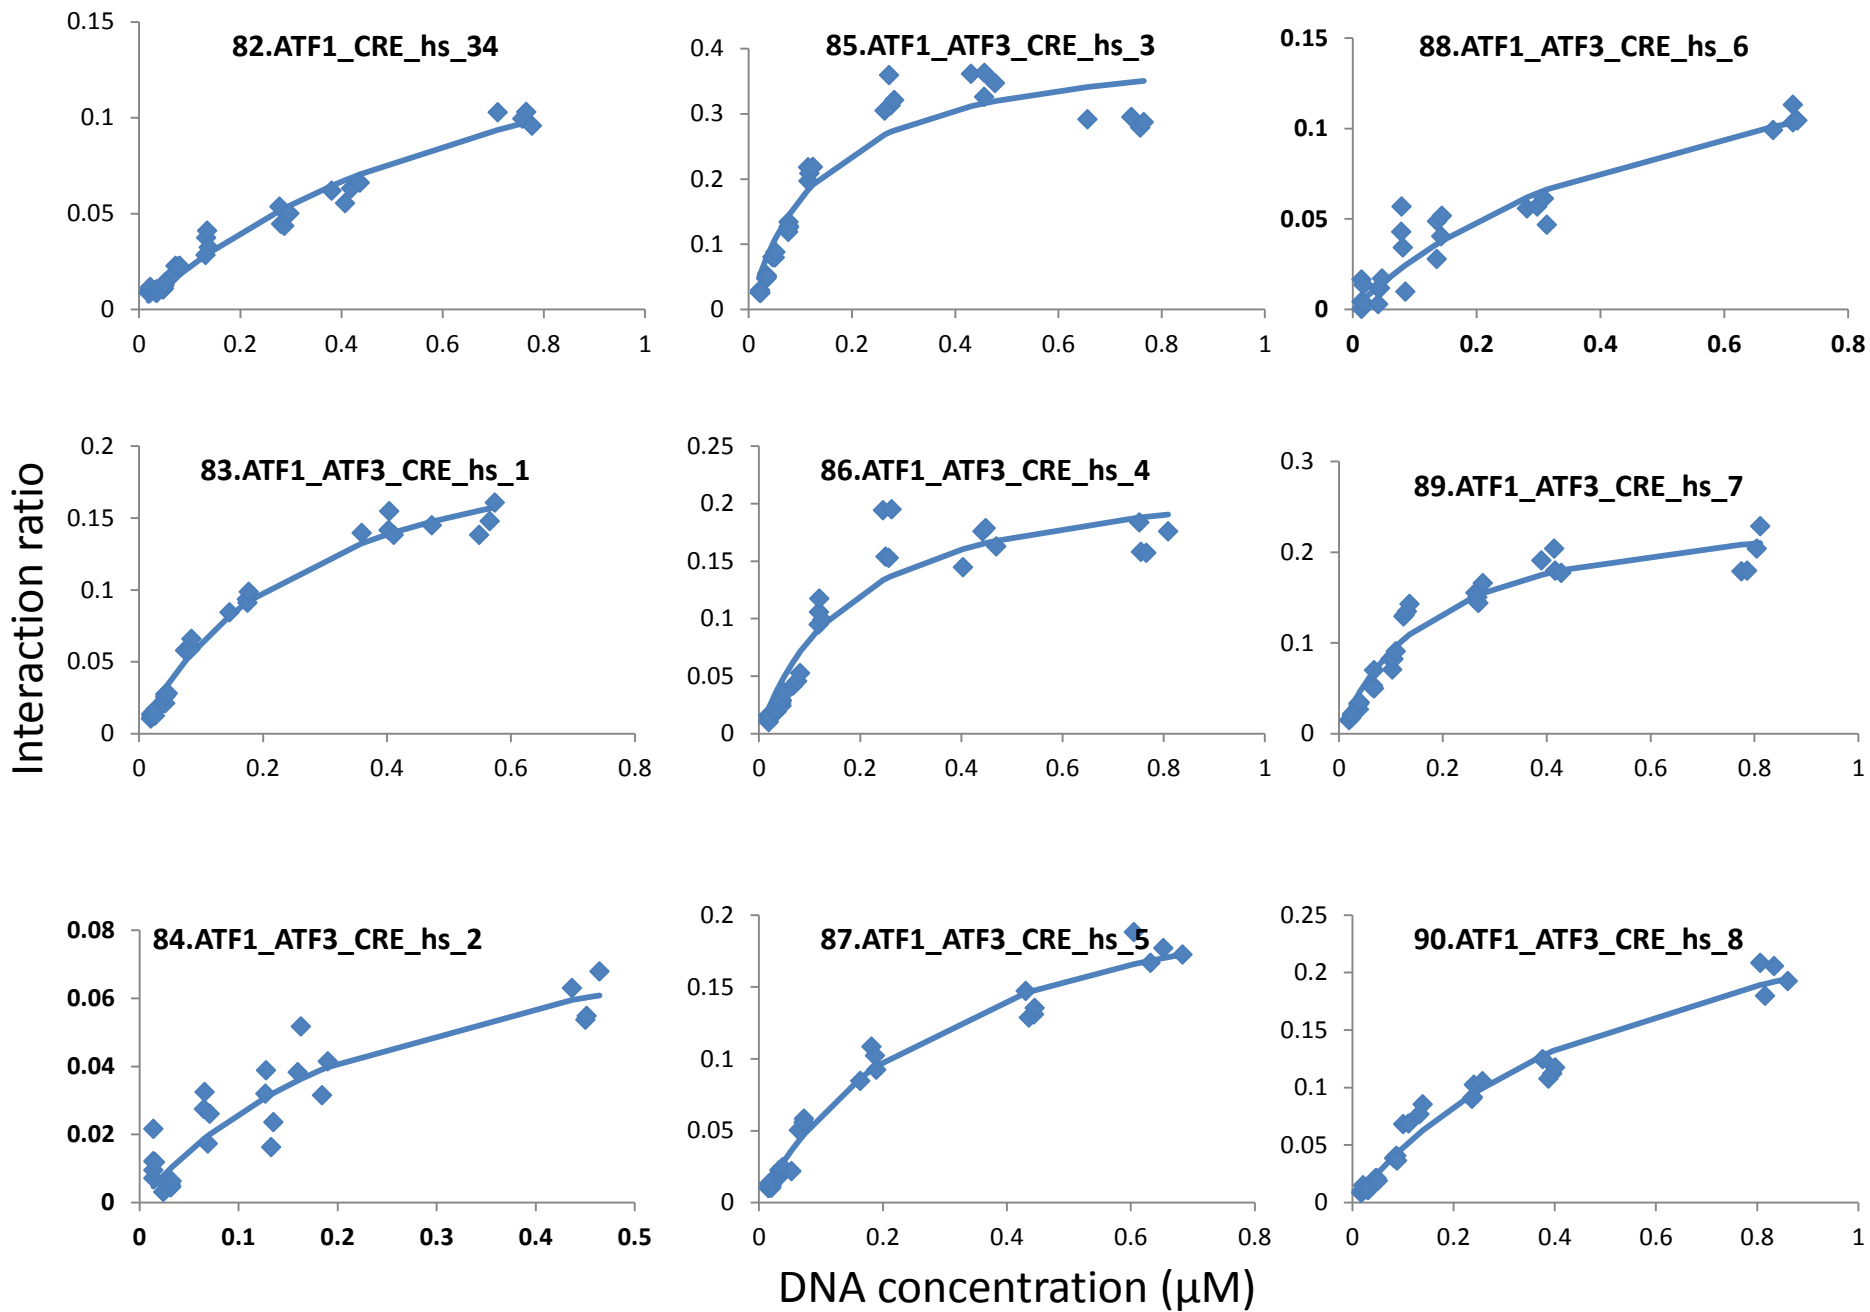

Interaction ratio

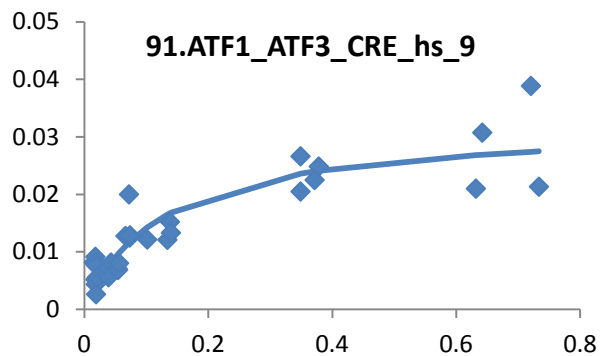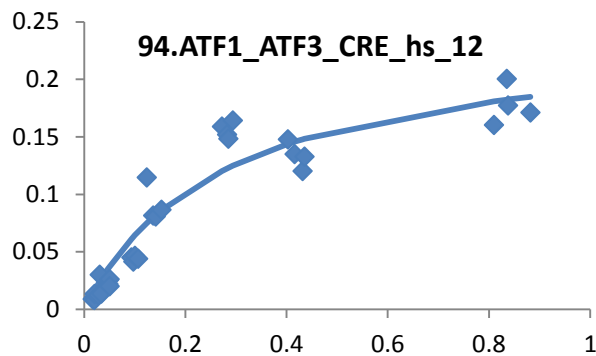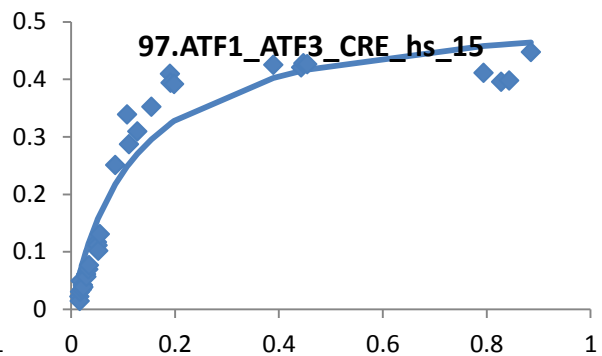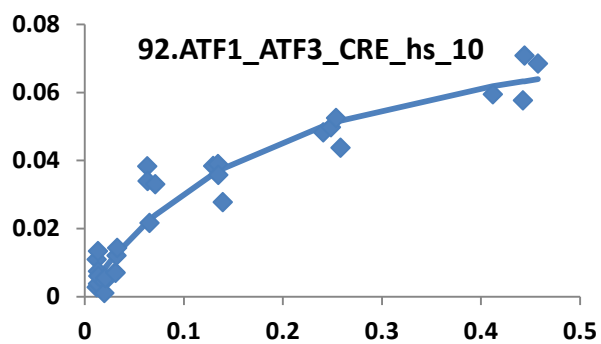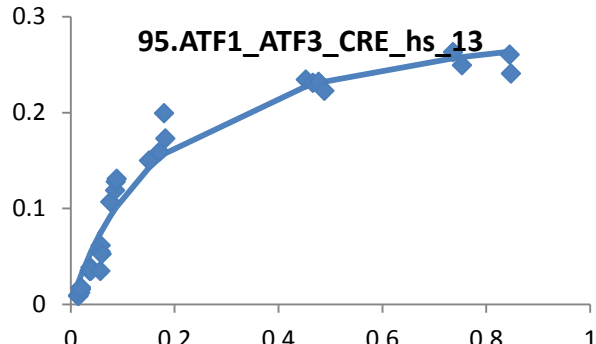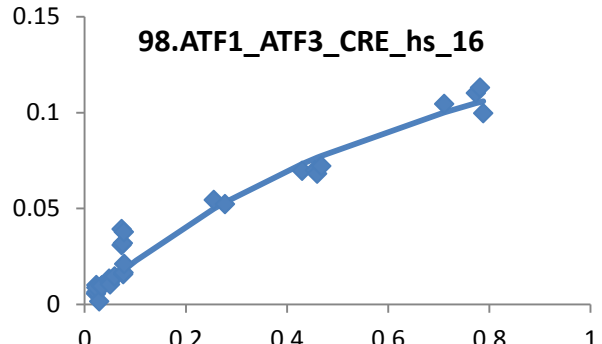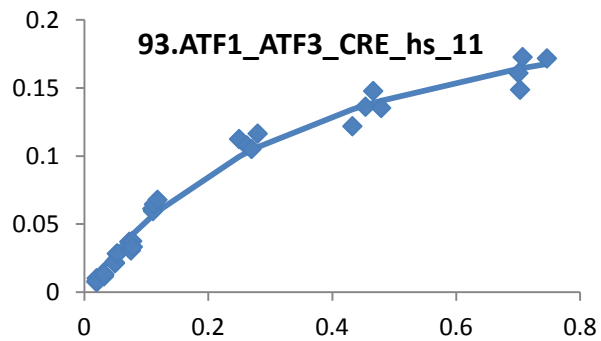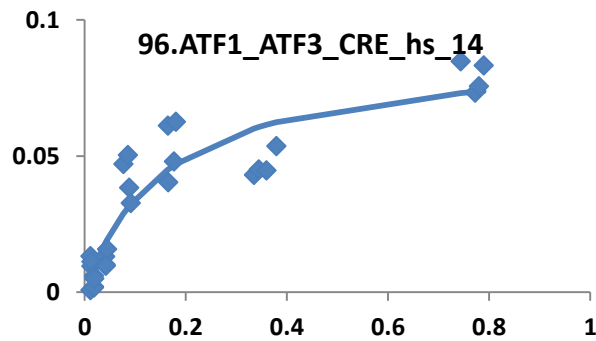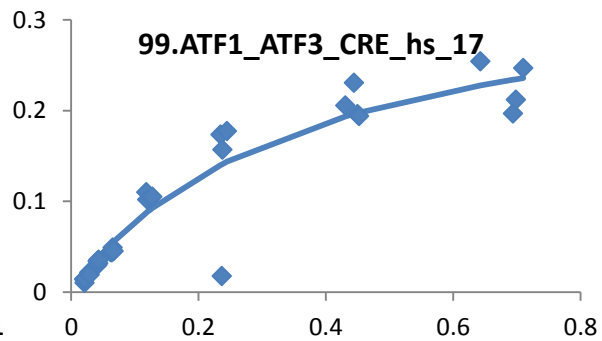

DNA concentration ( $\mu\text{M}$ )

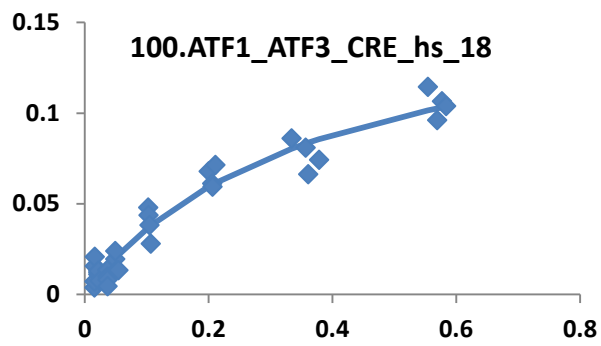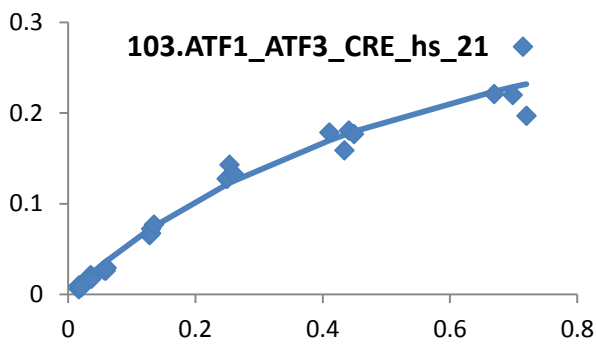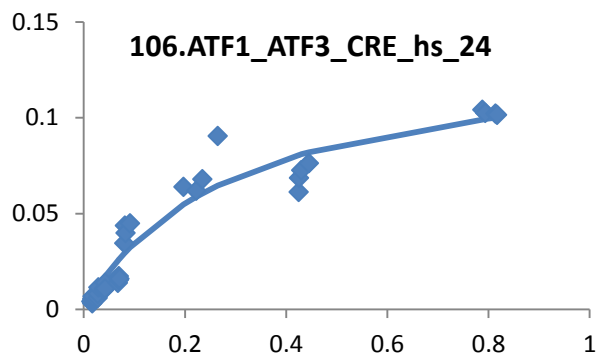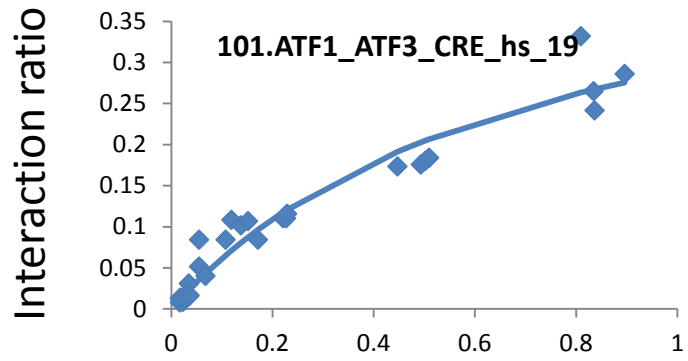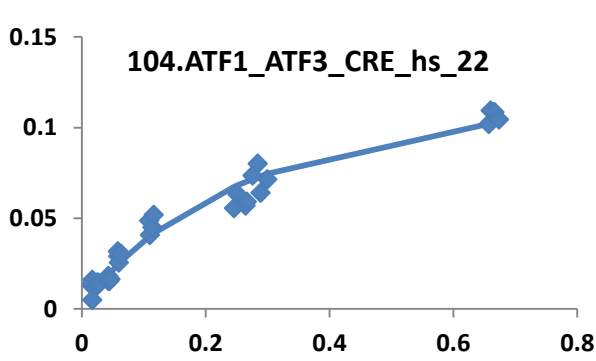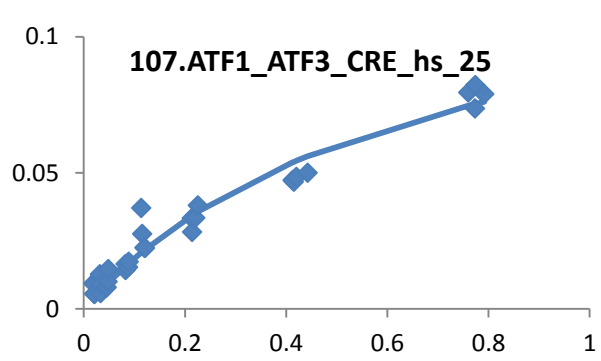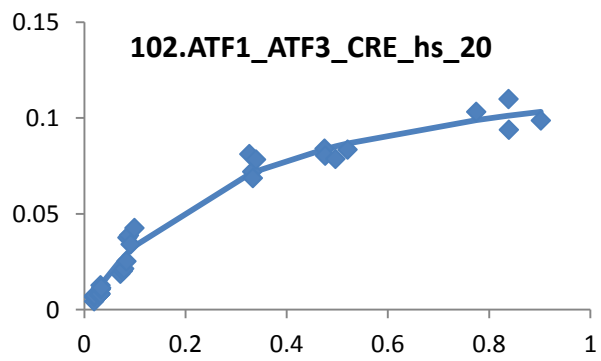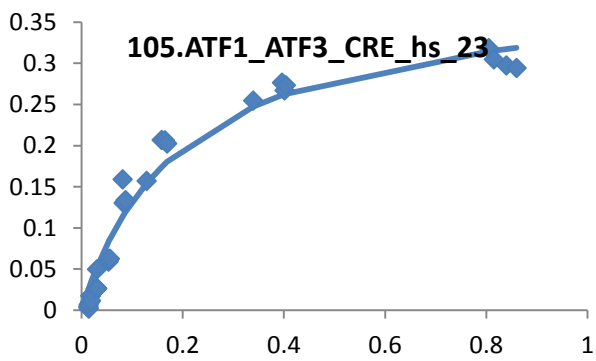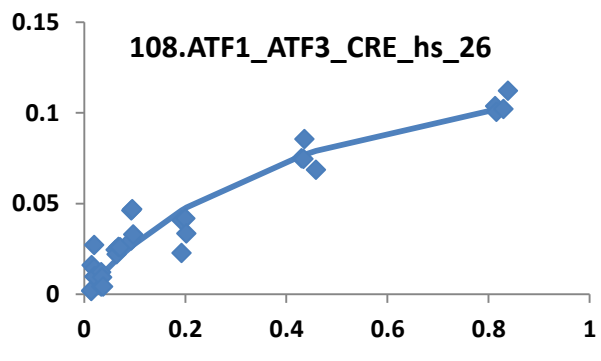

Interaction ratio

DNA concentration ( $\mu\text{M}$ )



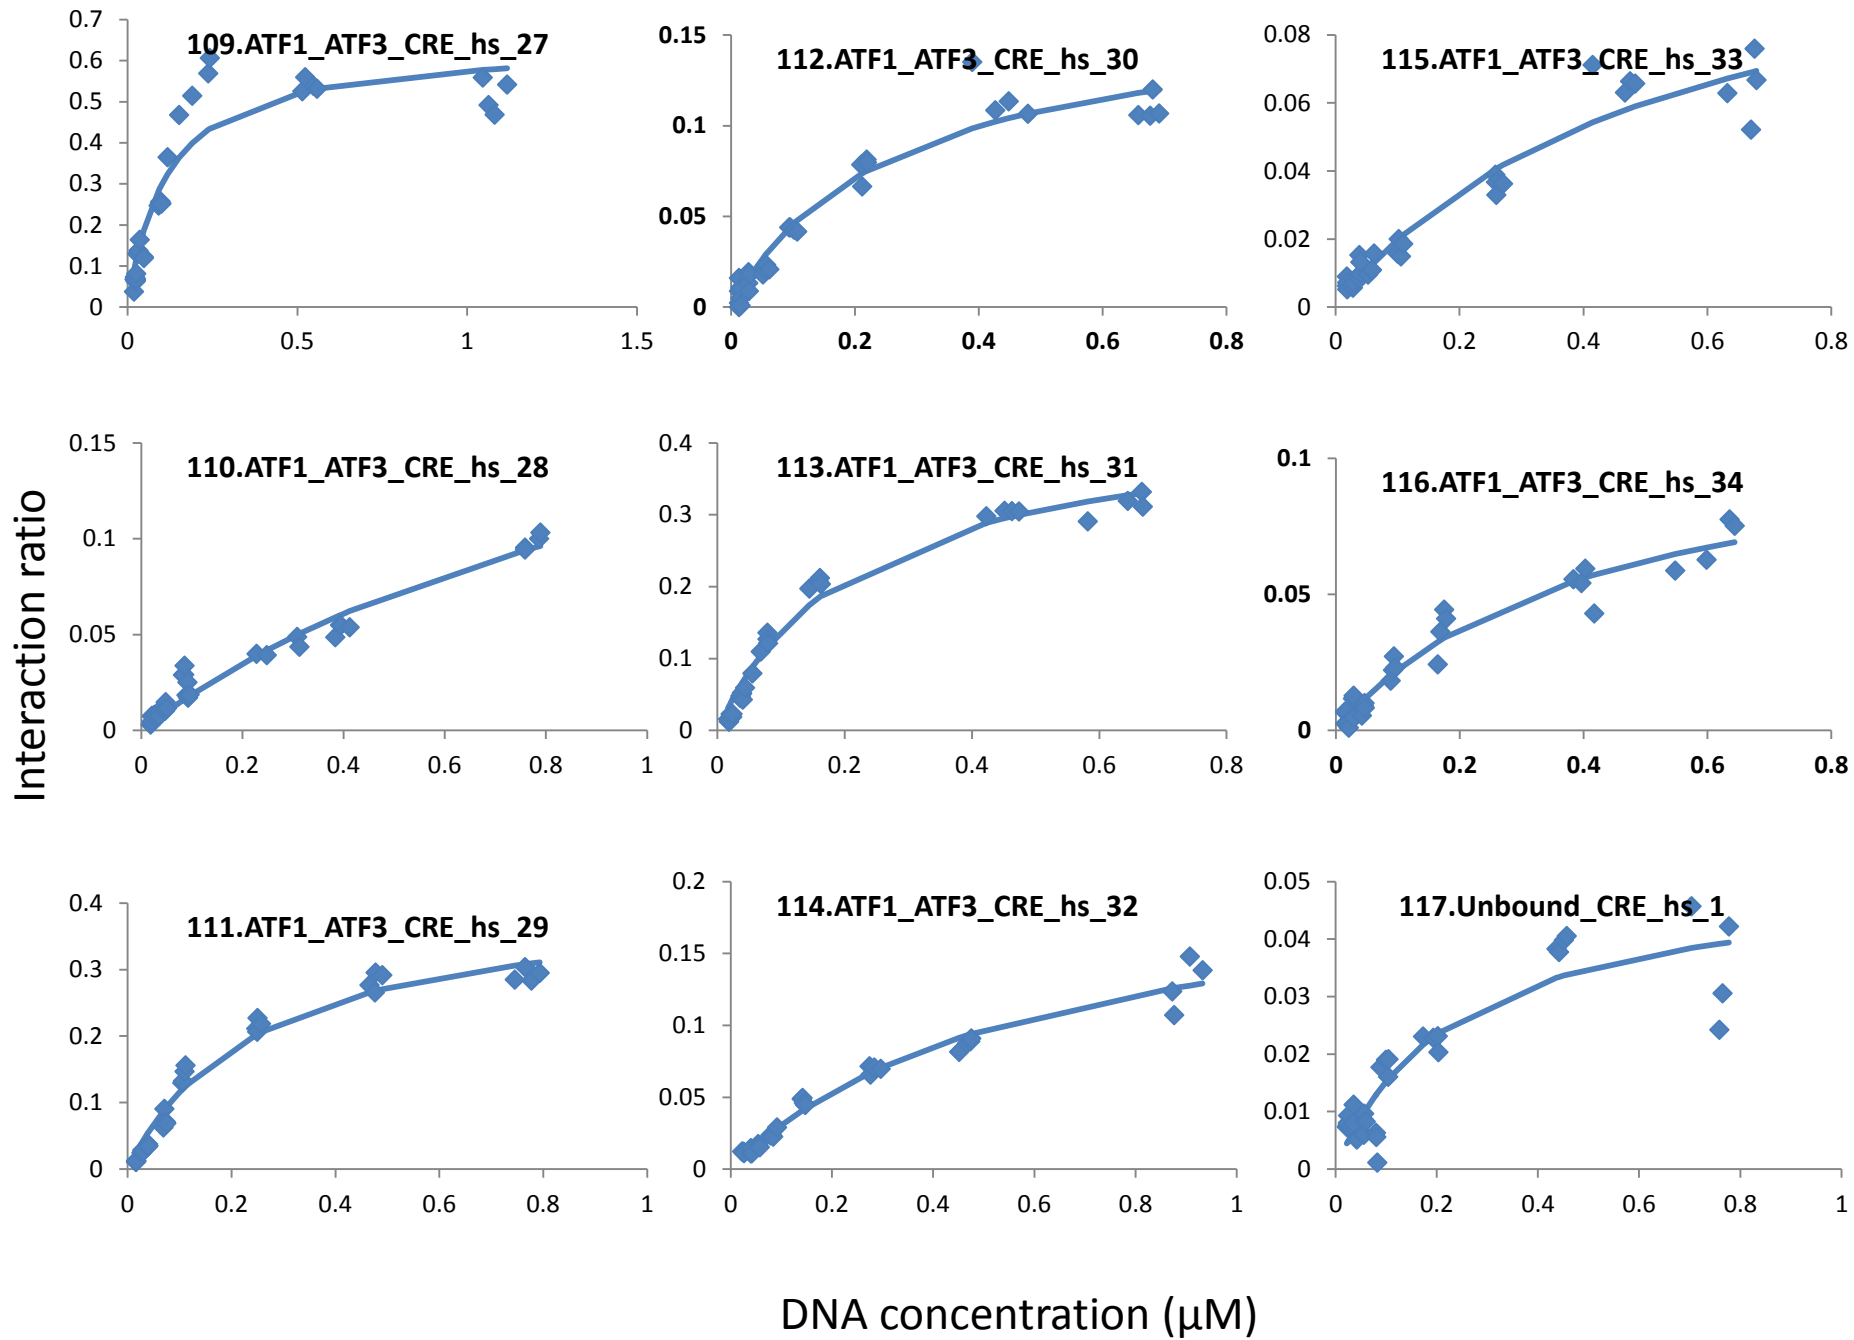

Interaction ratio

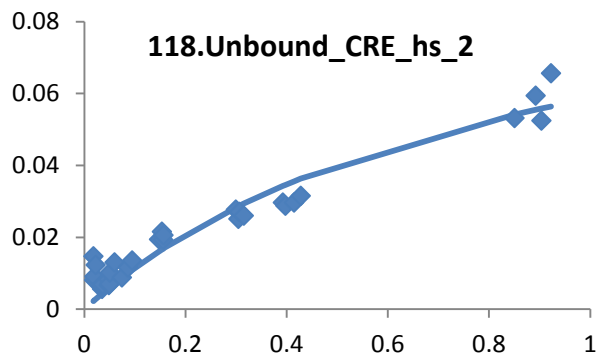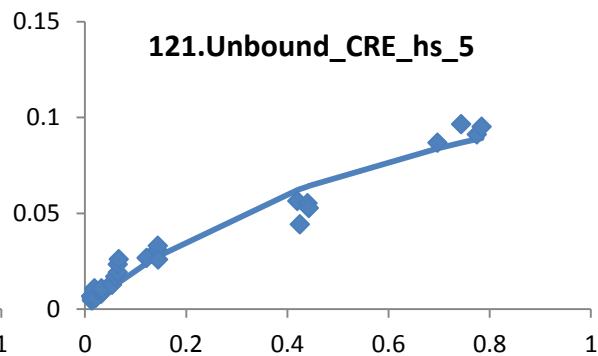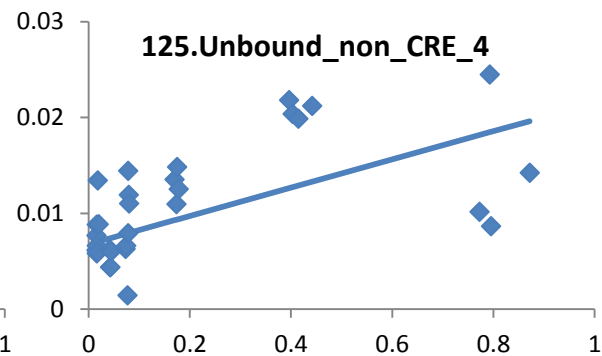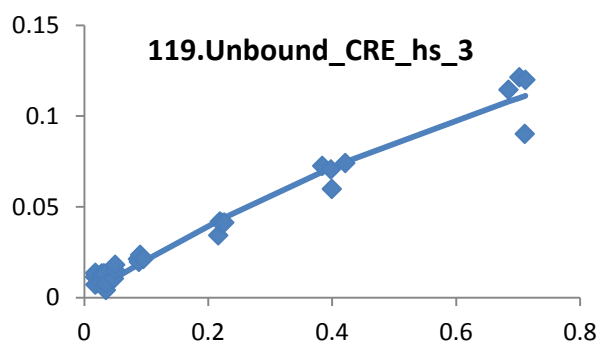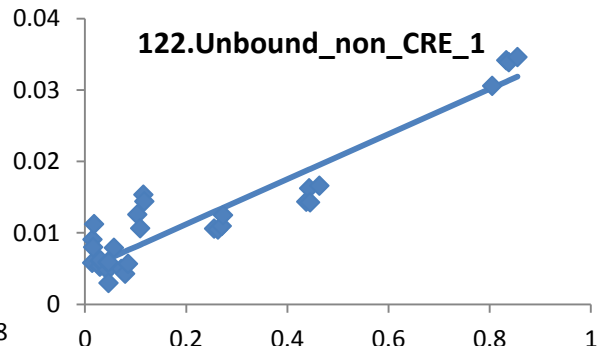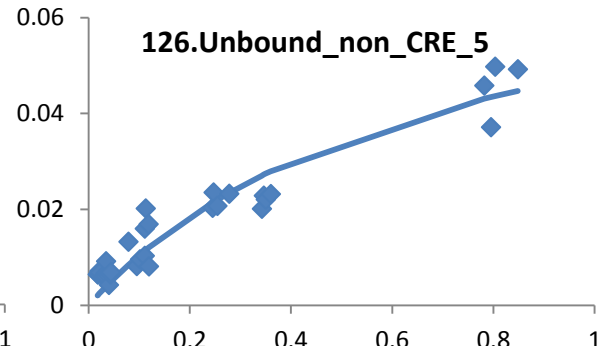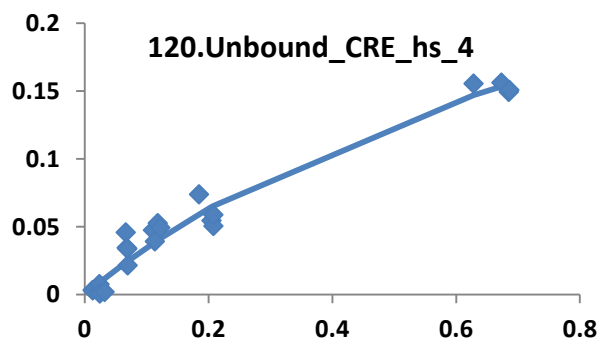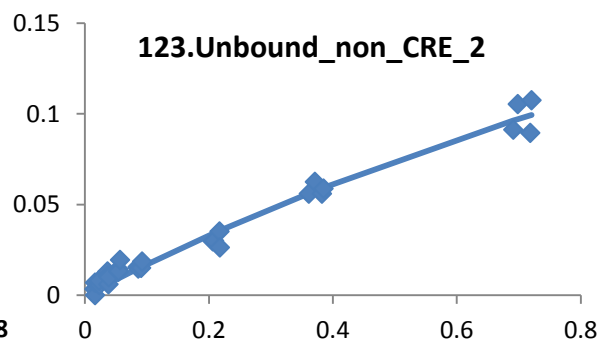

DNA concentration ( $\mu\text{M}$ )

## Supplementary Figure S4

**Figure S4 – ATF3 Quantitative analysis Kd's.** Affinity measurements between ATF3 and CRE sequences. We programmed the QPID device with different genomic CRE sequences. ATF3 was immobilized to the device surface, flooding DNA chambers solubilized spotted DNA, allowing ATF3 and DNA to interact. Protein expression levels (Cy3) and interacting DNA signals (Cy5) were measured. Interaction ratio – Cy5/Cy3

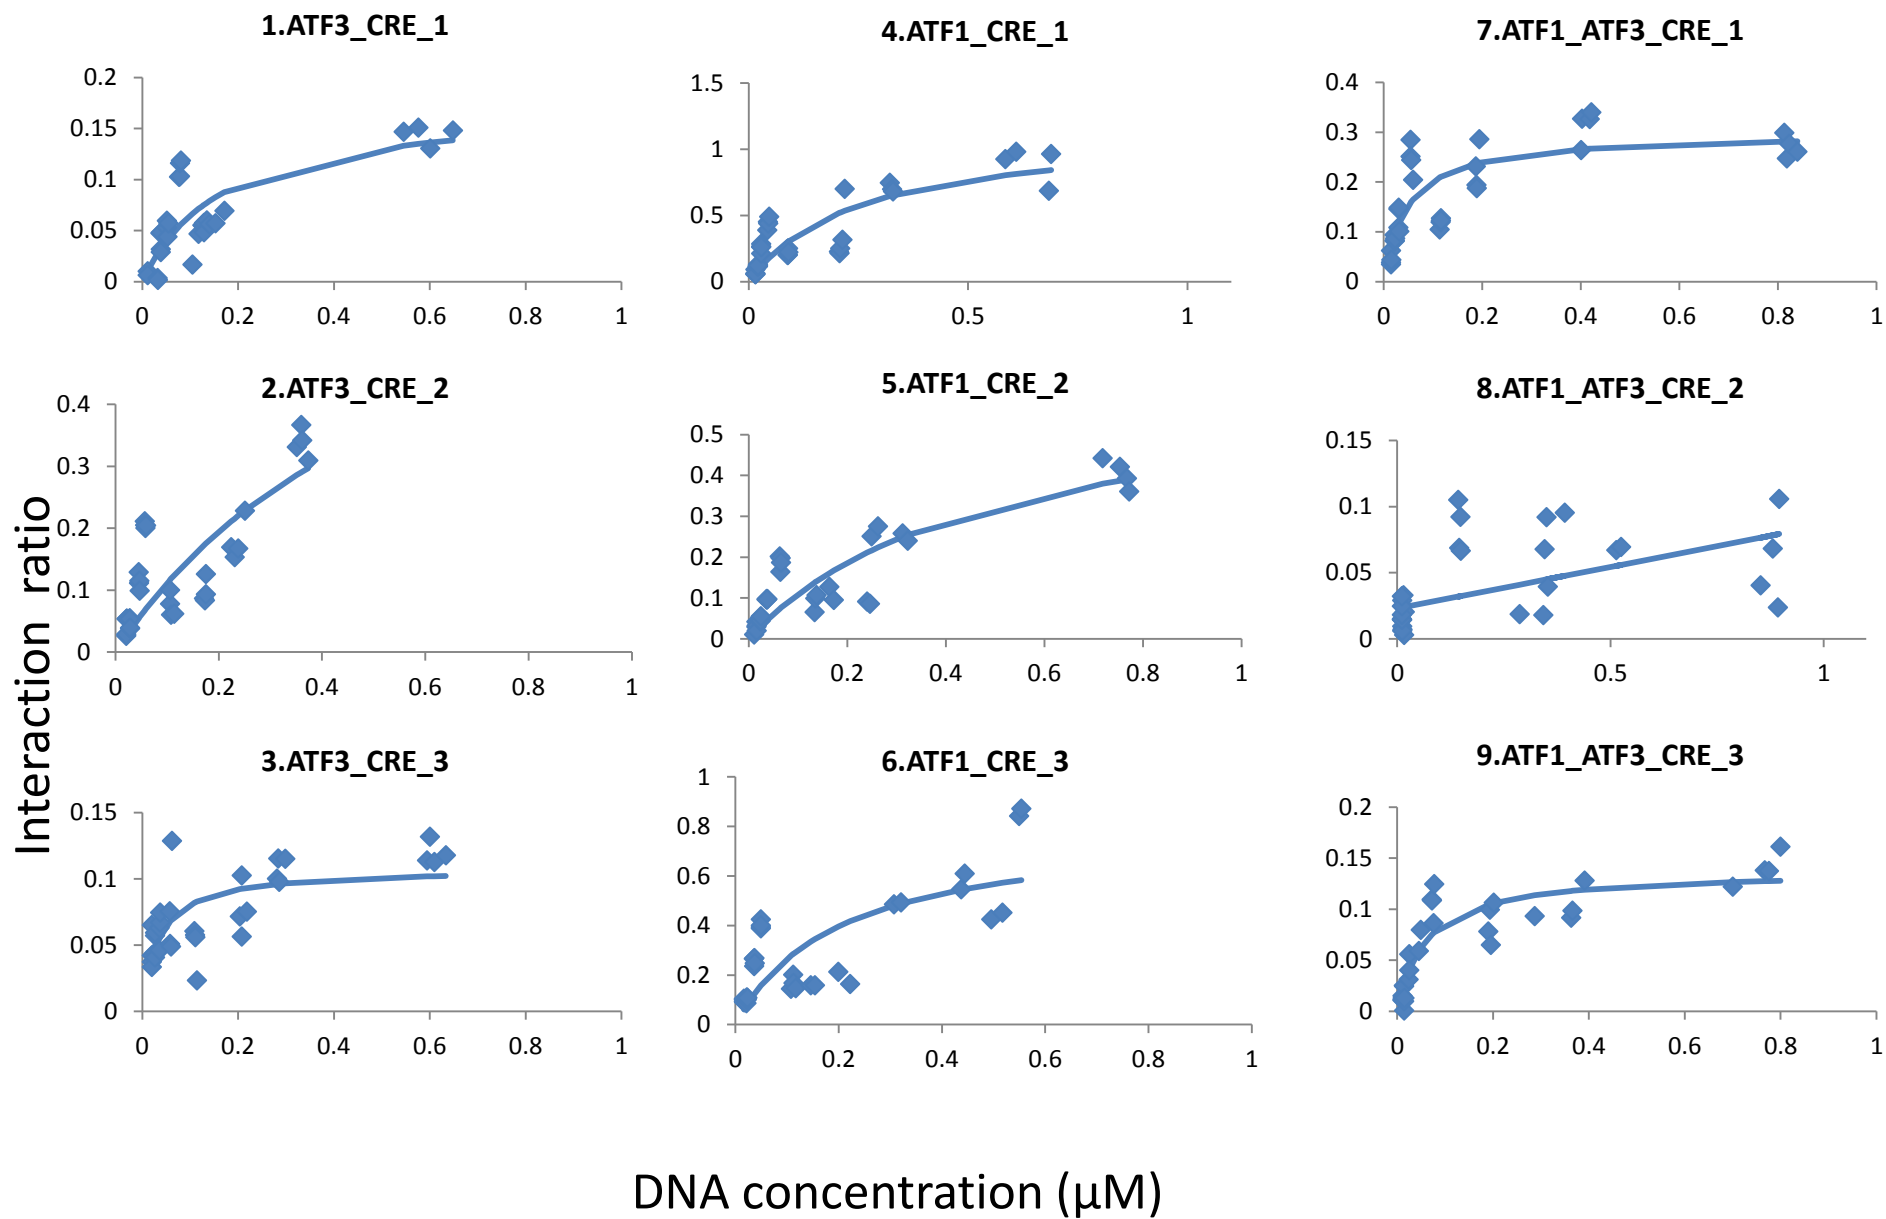

Interaction Ratio

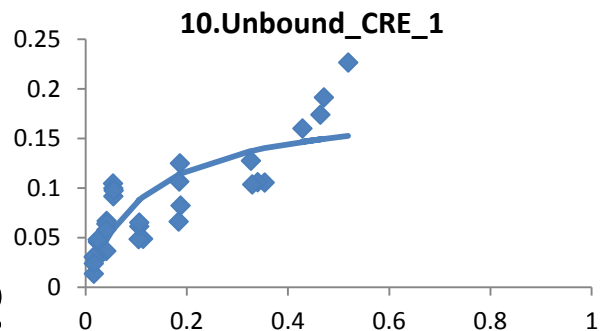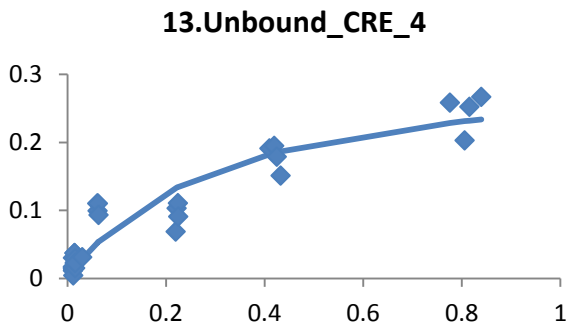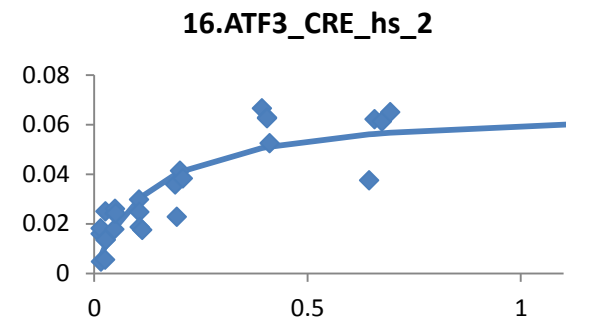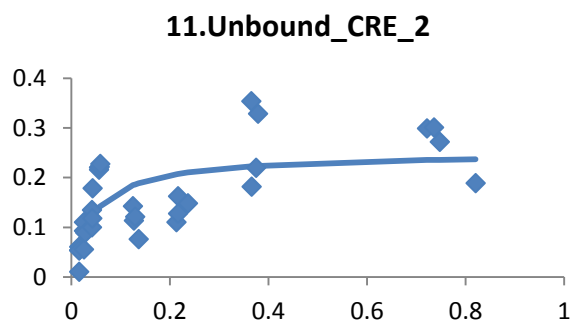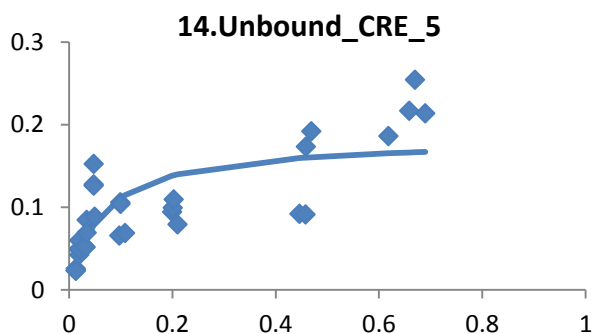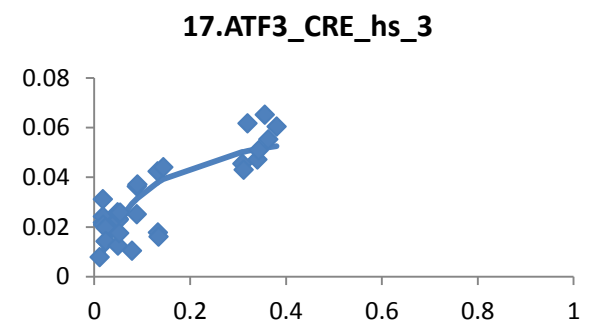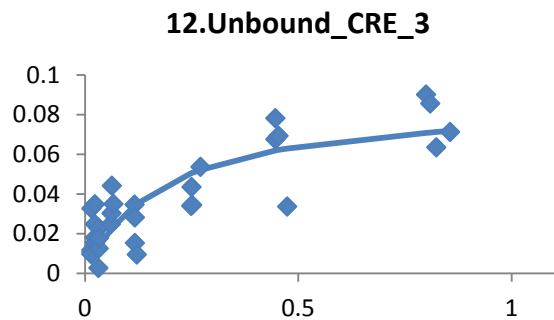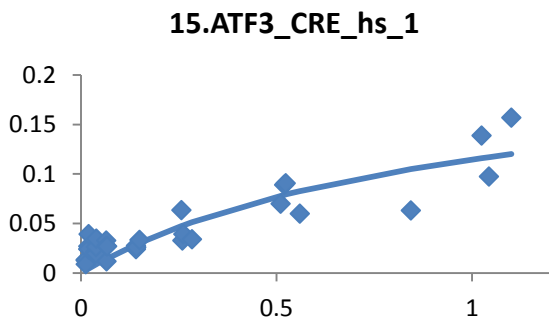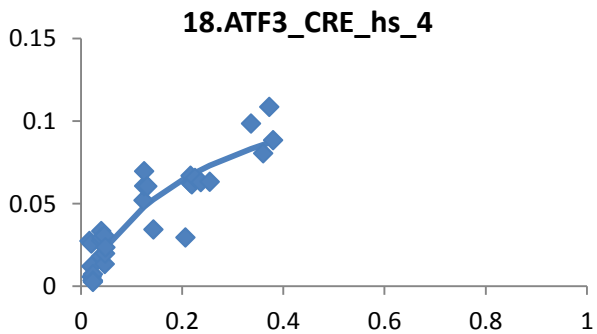

DNA concentration ( $\mu\text{M}$ )

Interaction ratio

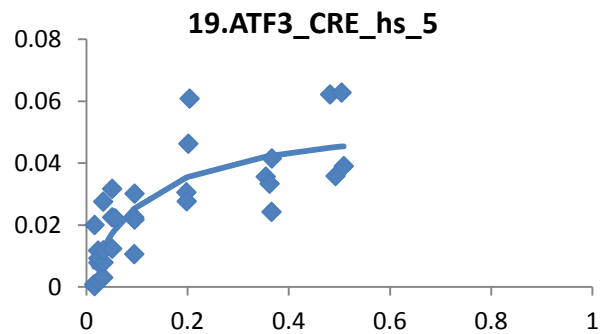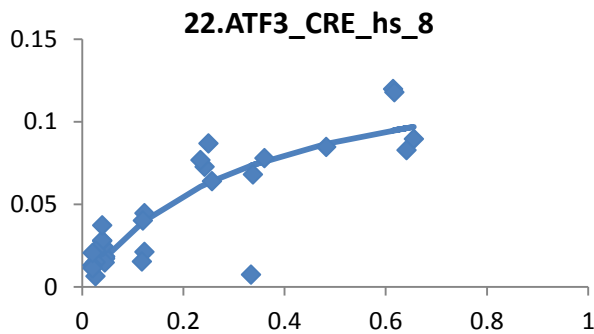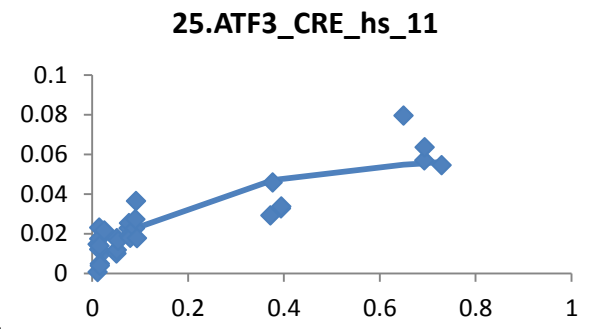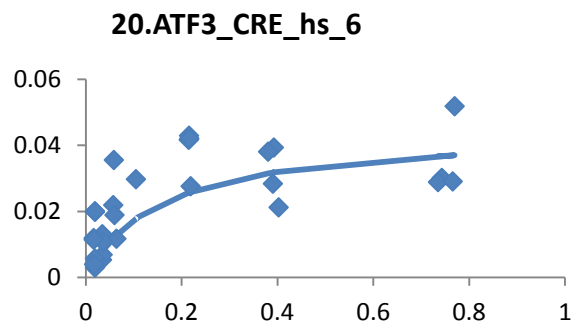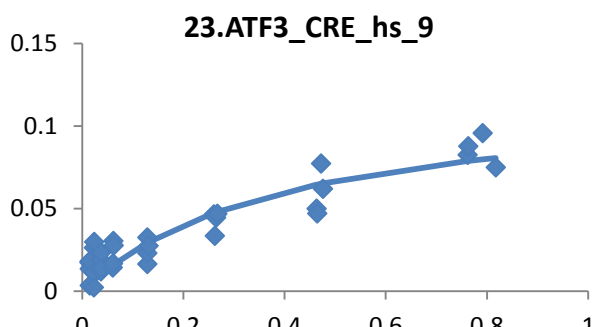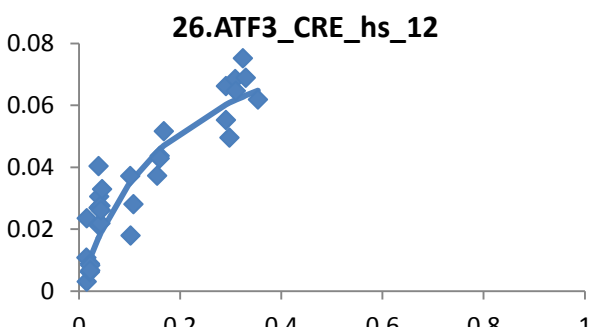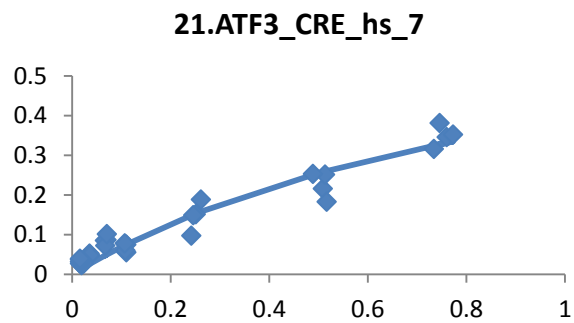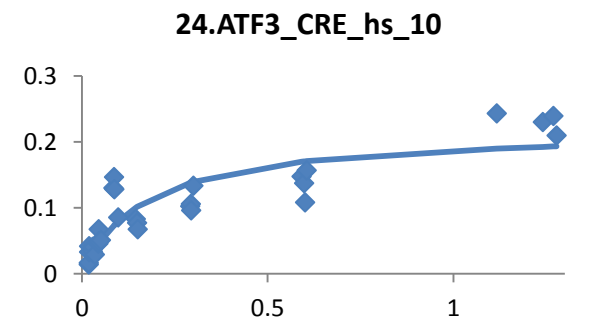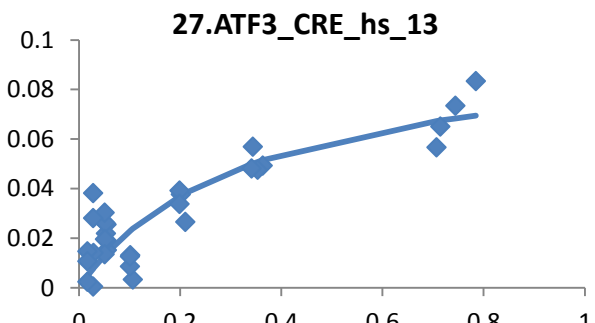

DNA concentration ( $\mu\text{M}$ )

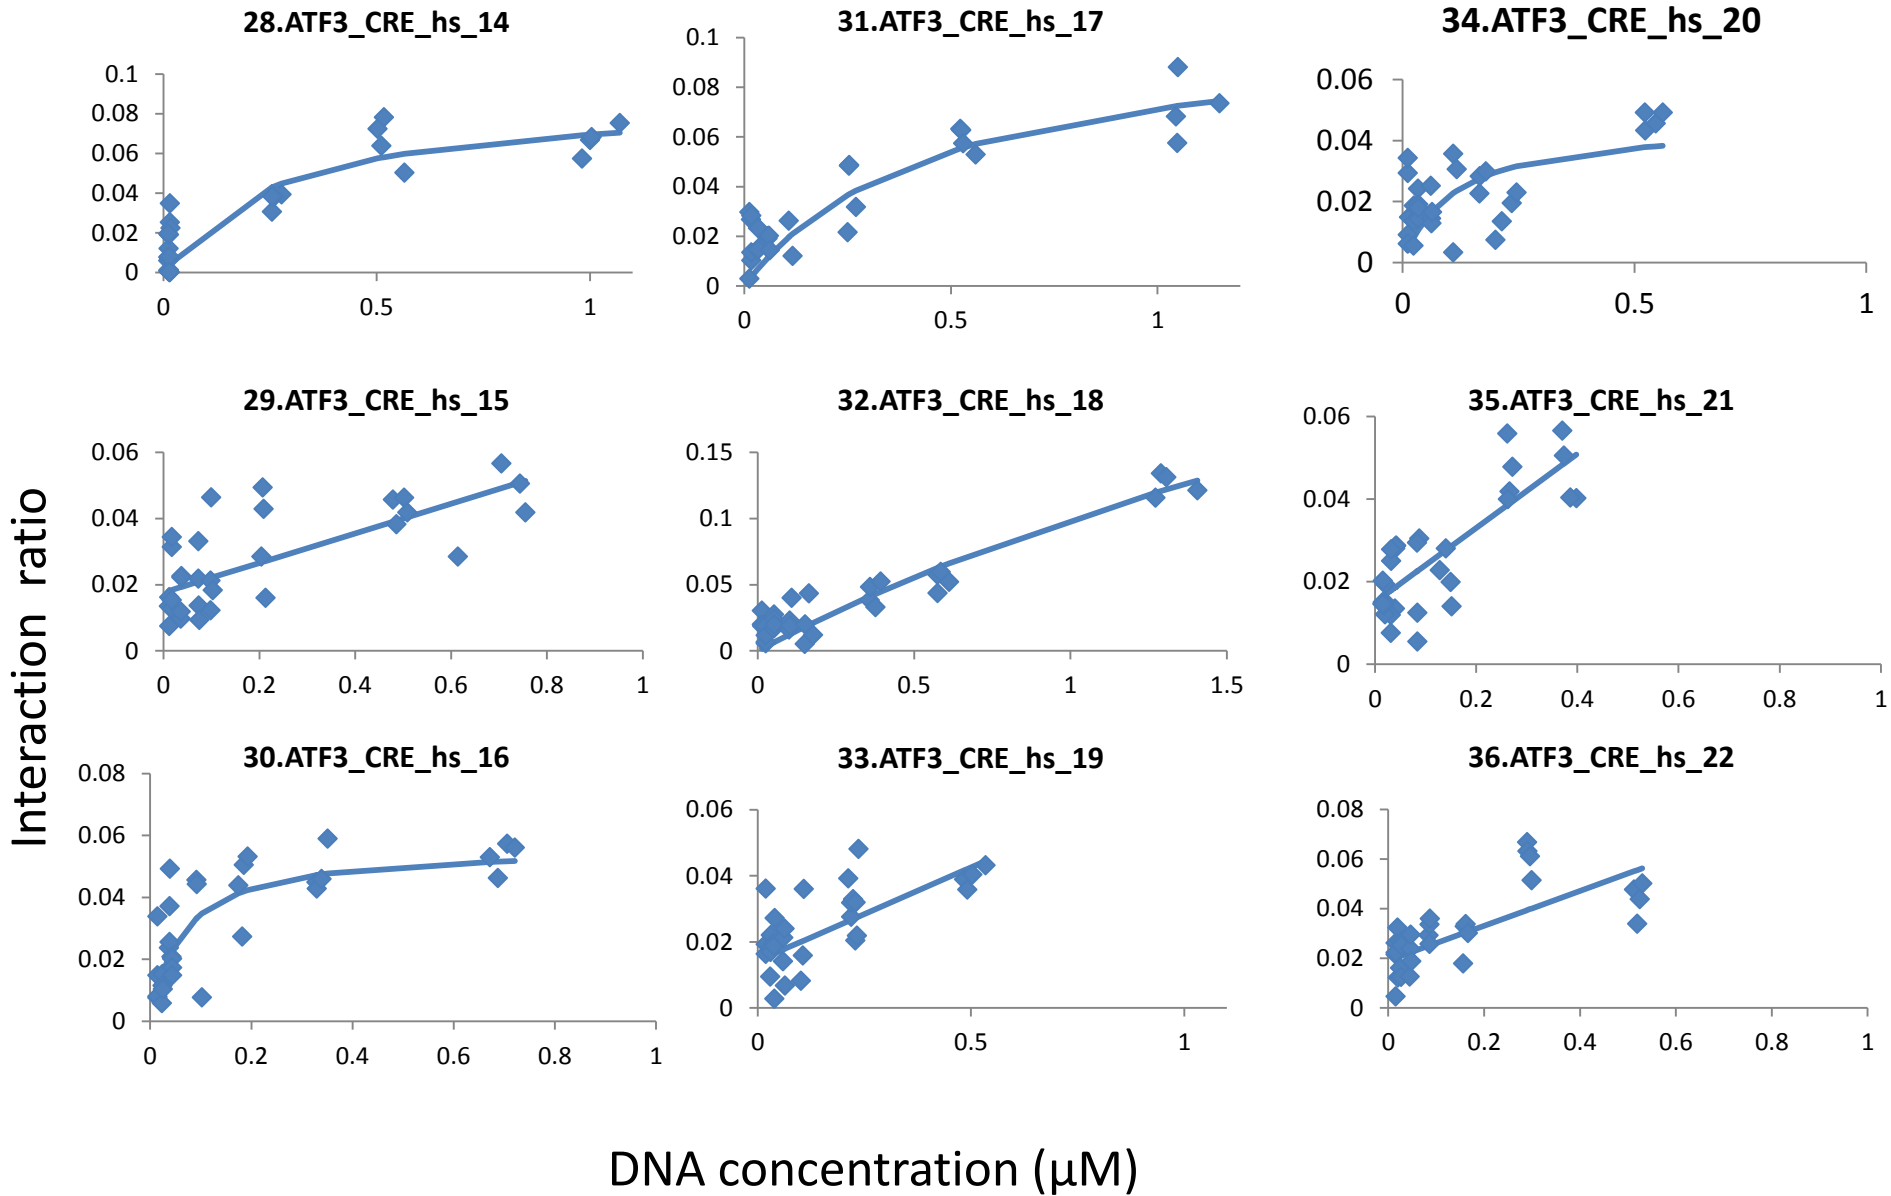

Interaction ratio

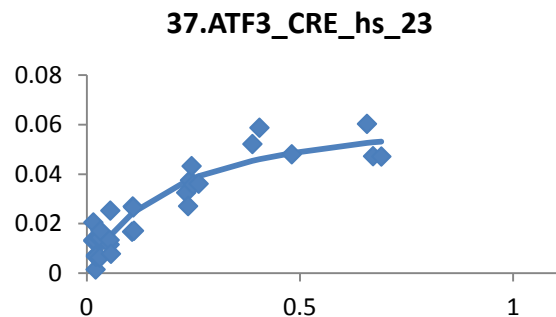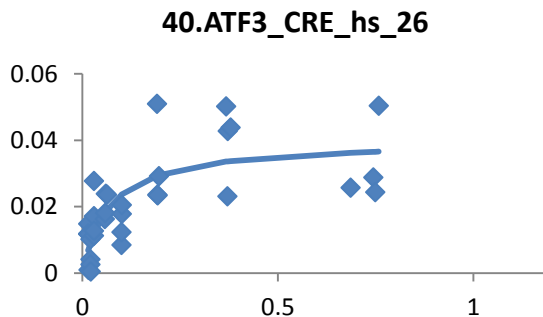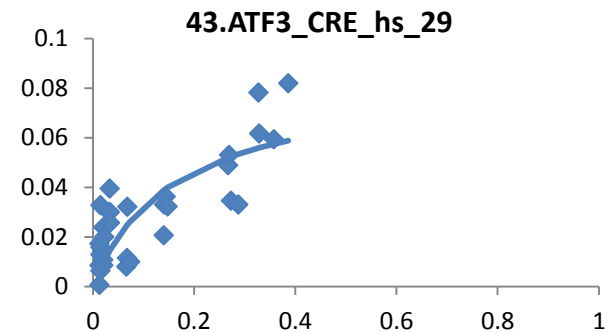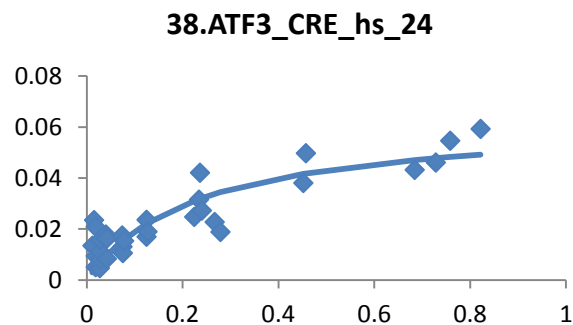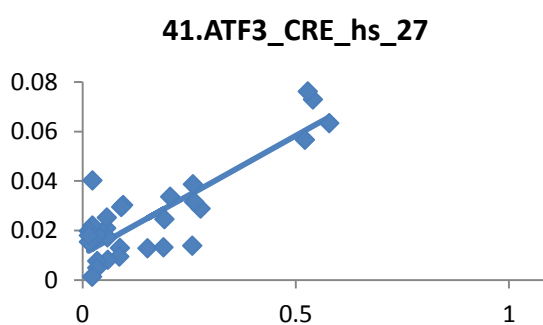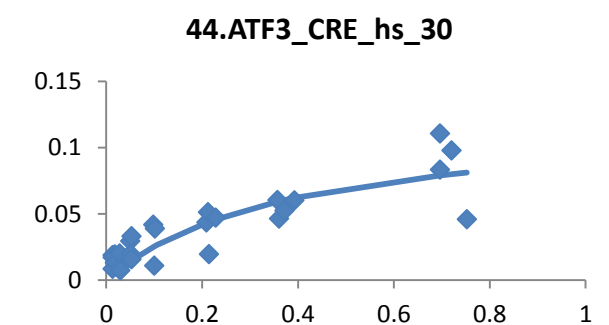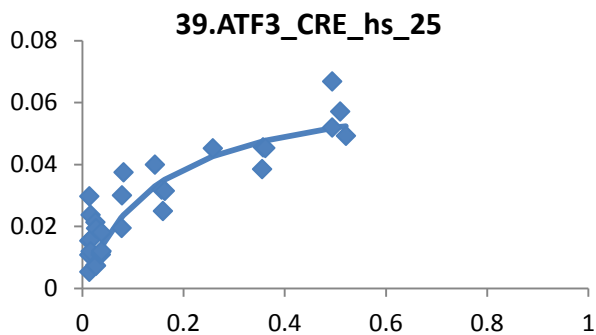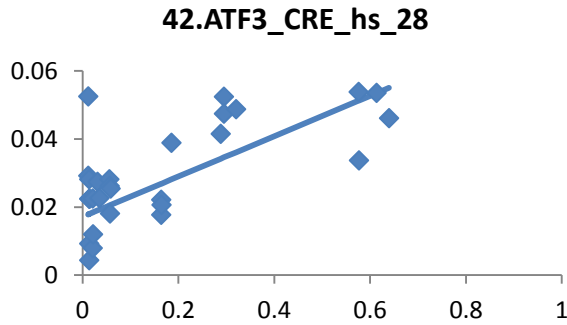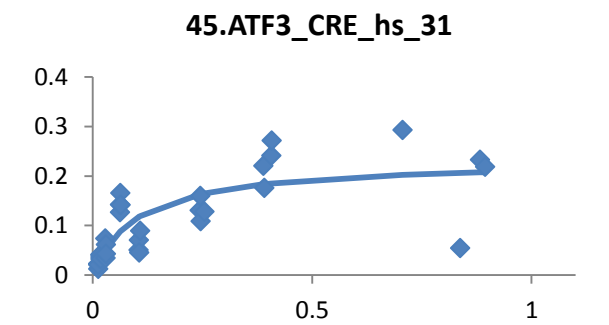

DNA concentration ( $\mu\text{M}$ )



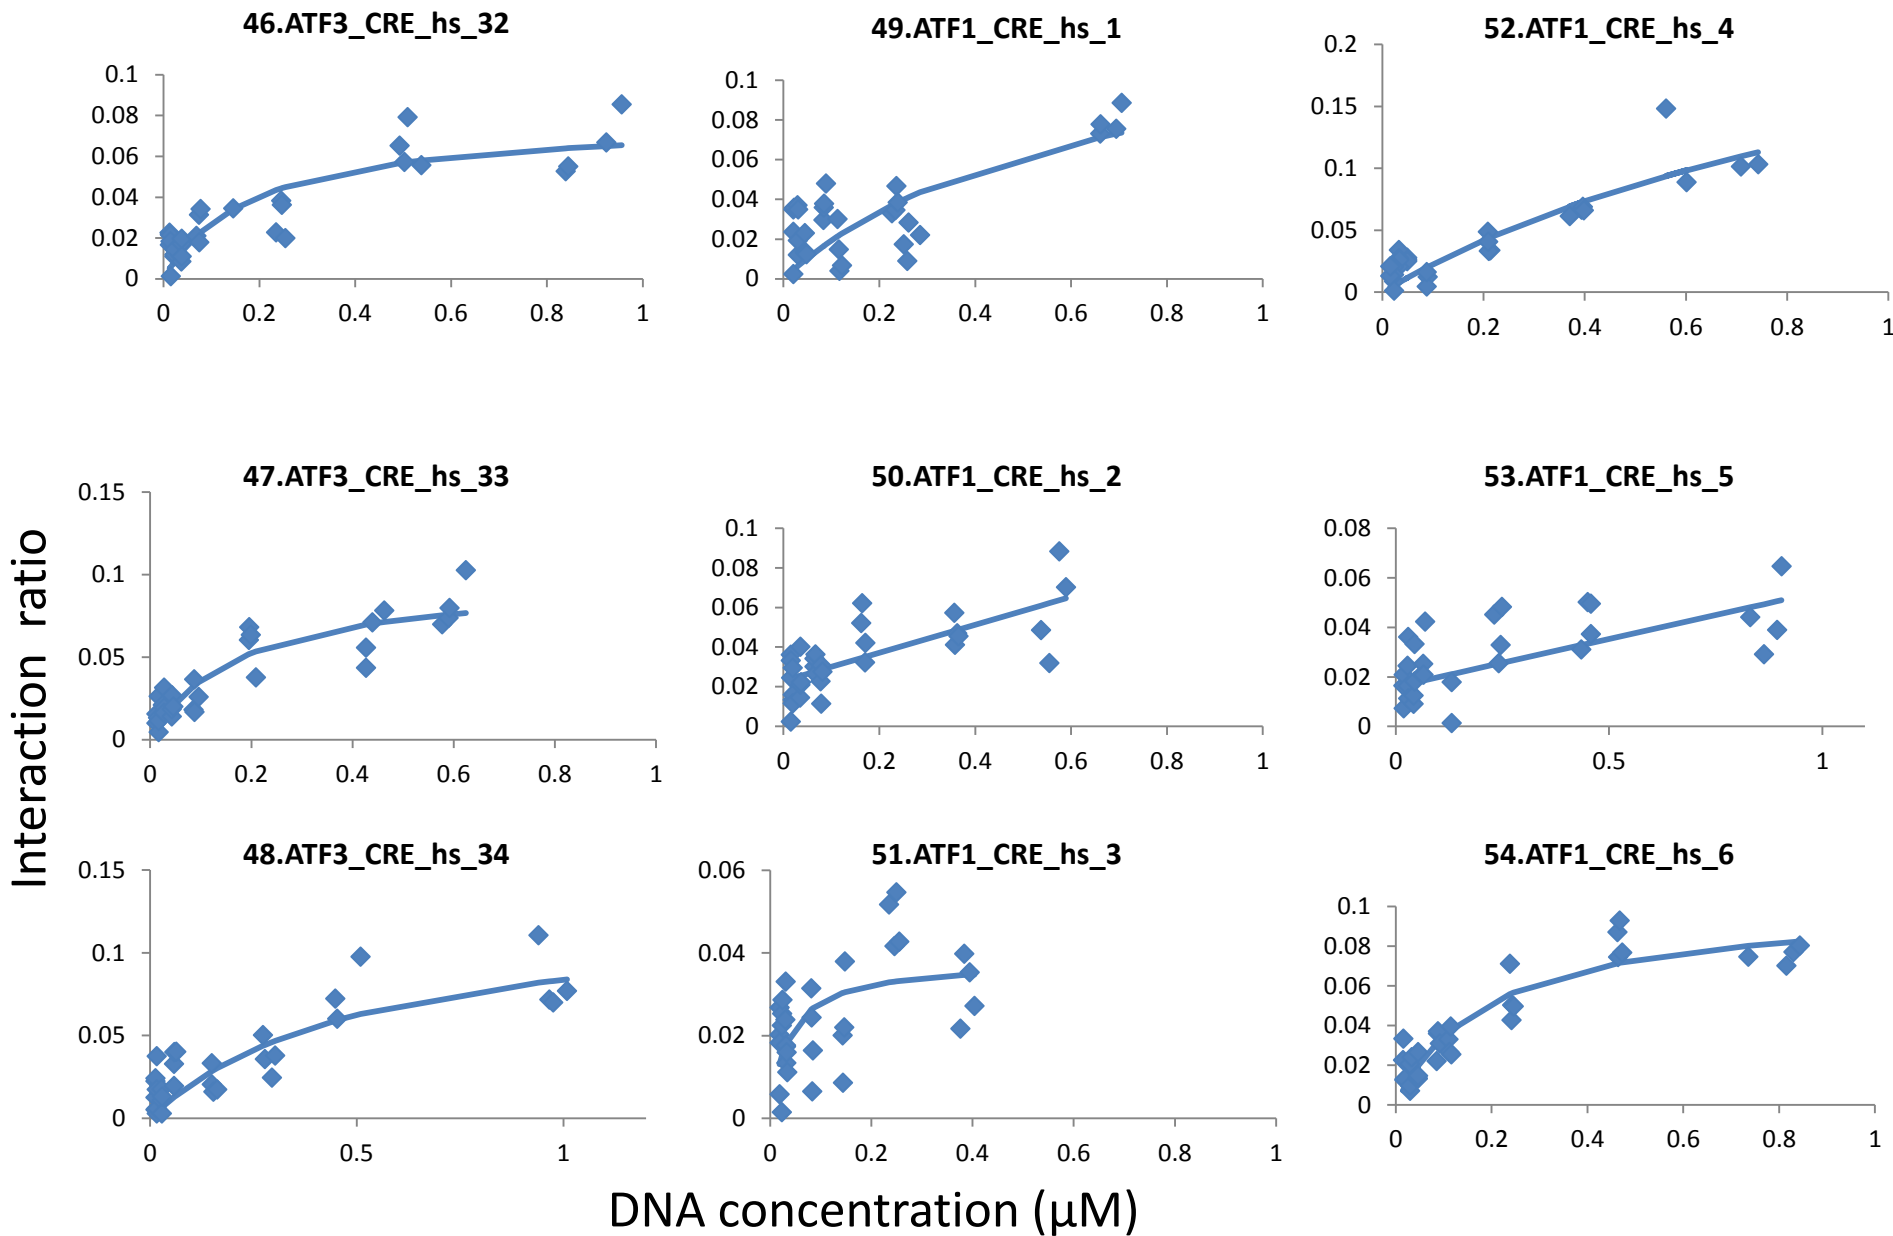

Interaction ratio

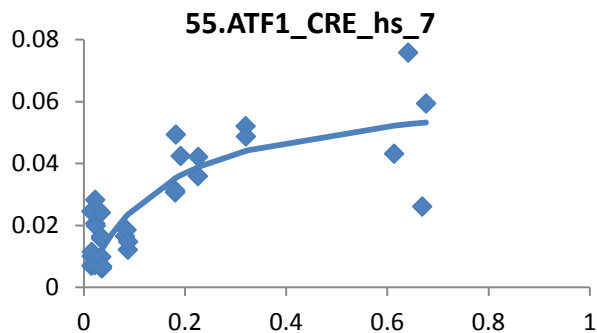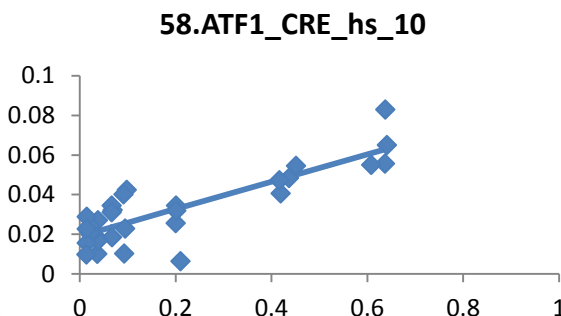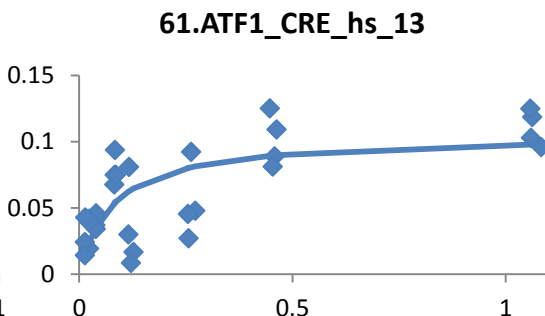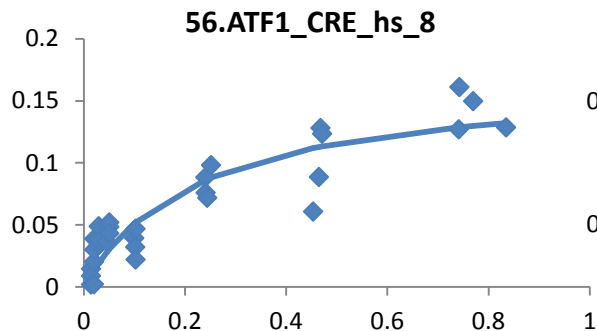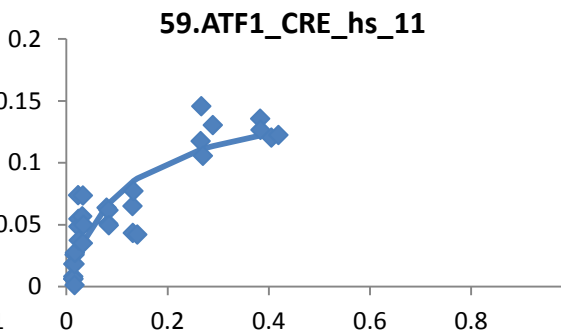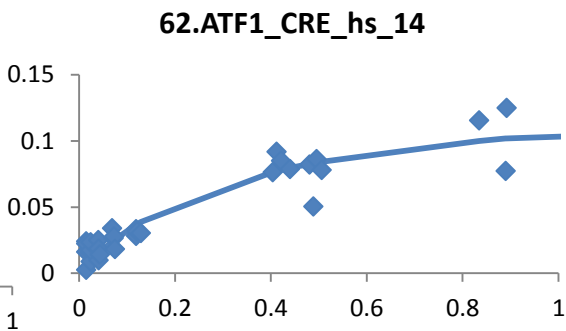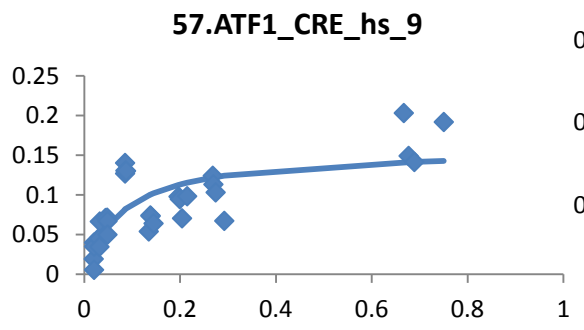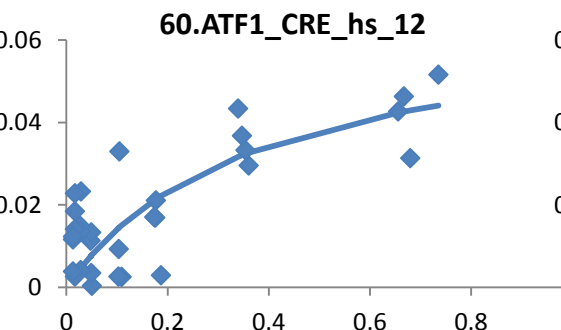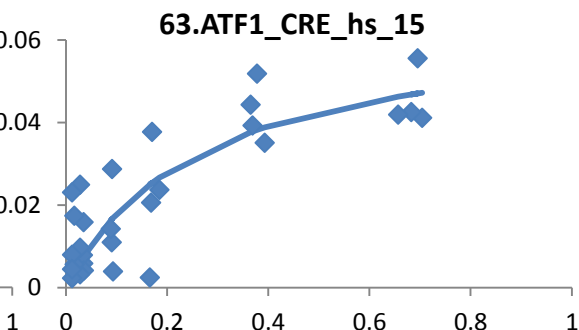

DNA concentration ( $\mu\text{M}$ )

Interaction ratio

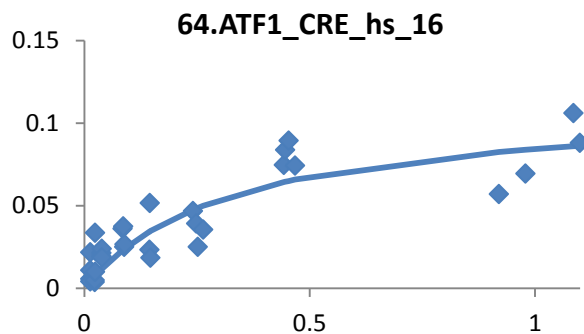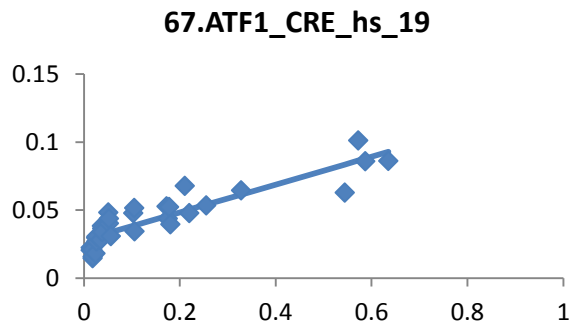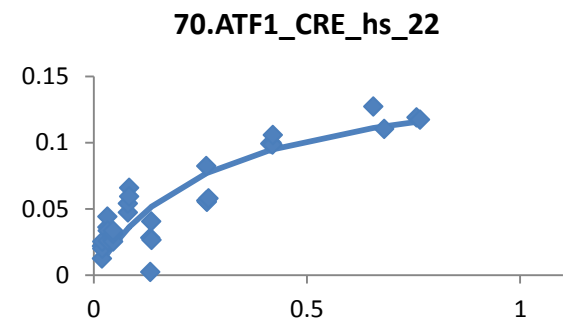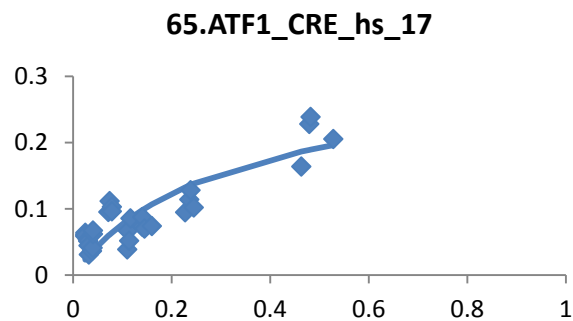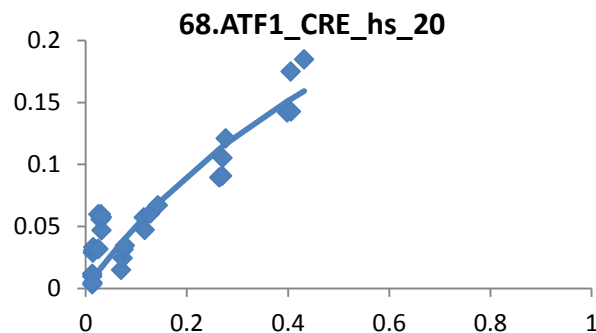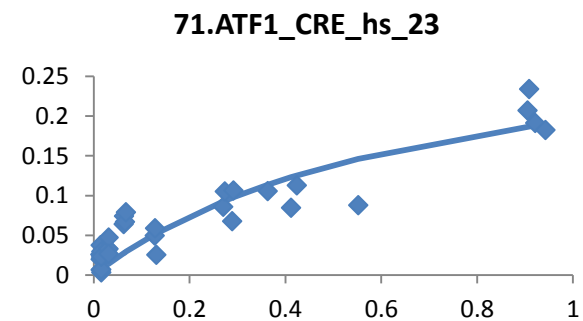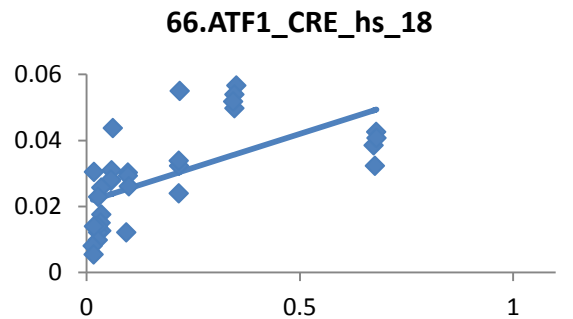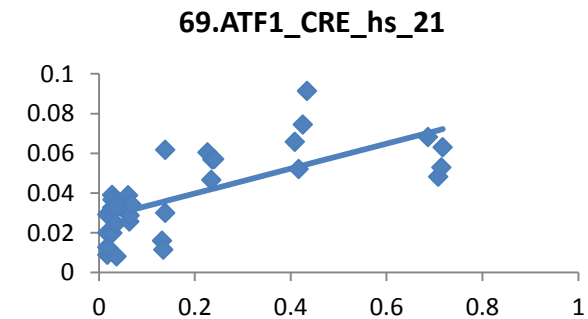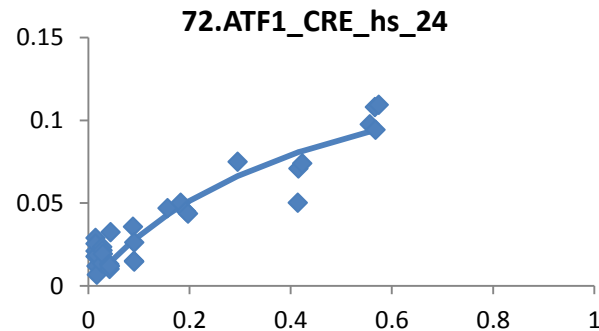

DNA concentration ( $\mu\text{M}$ )

Interaction ratio

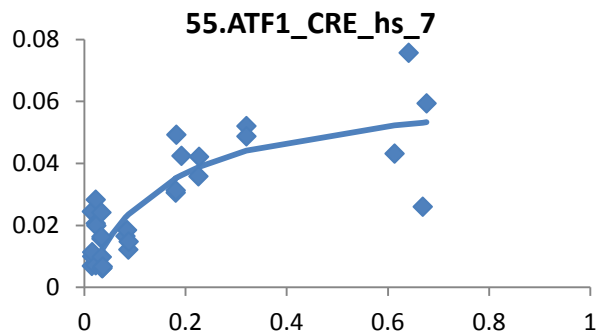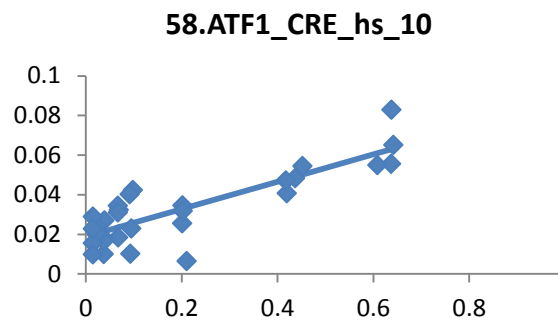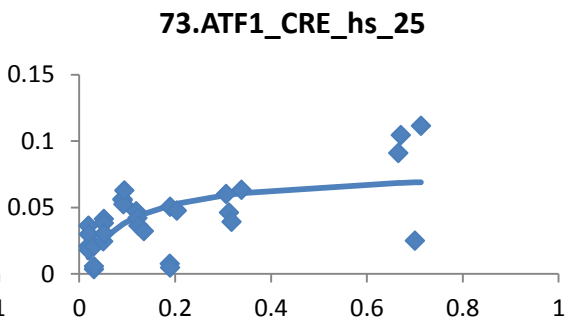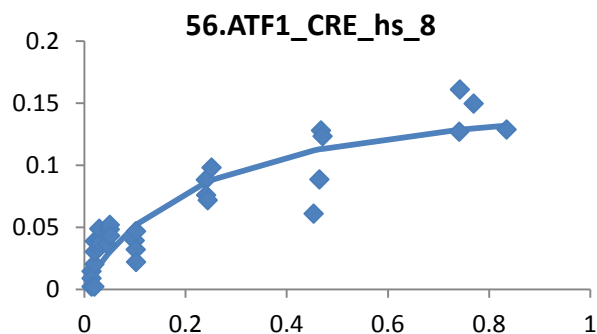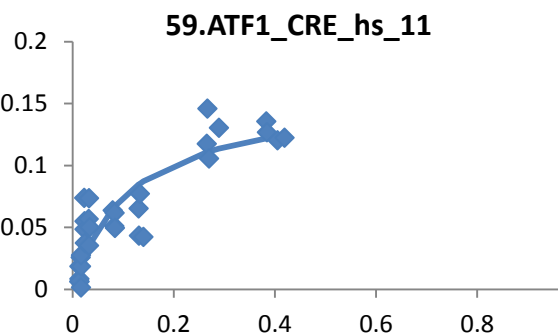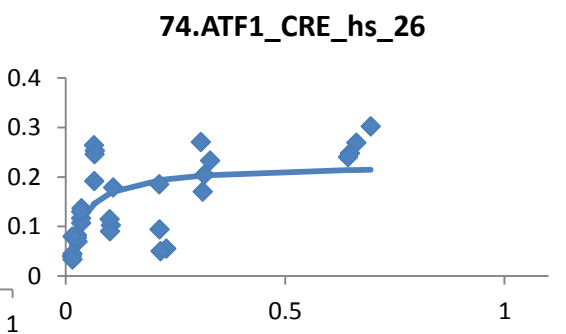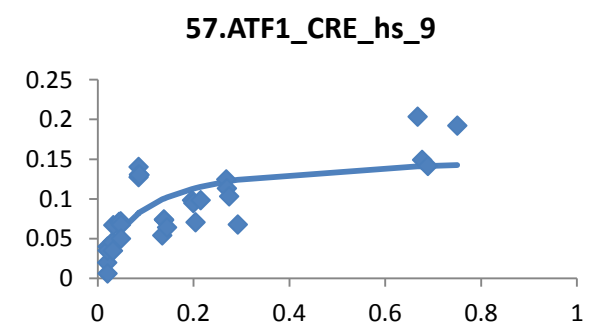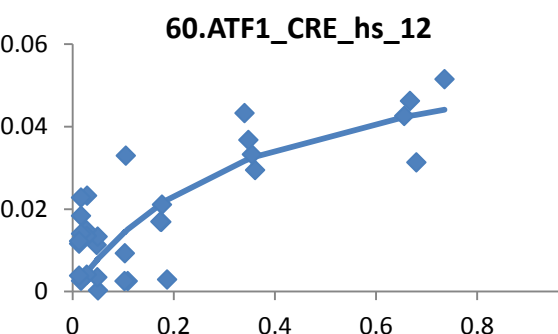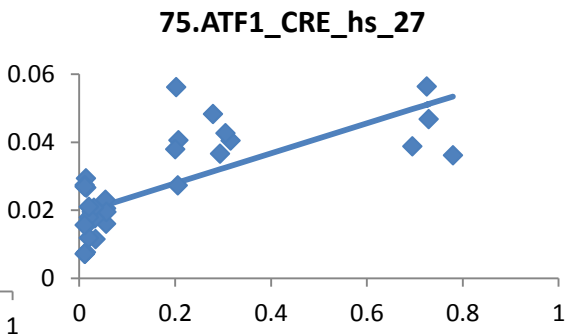

DNA concentration ( $\mu\text{M}$ )

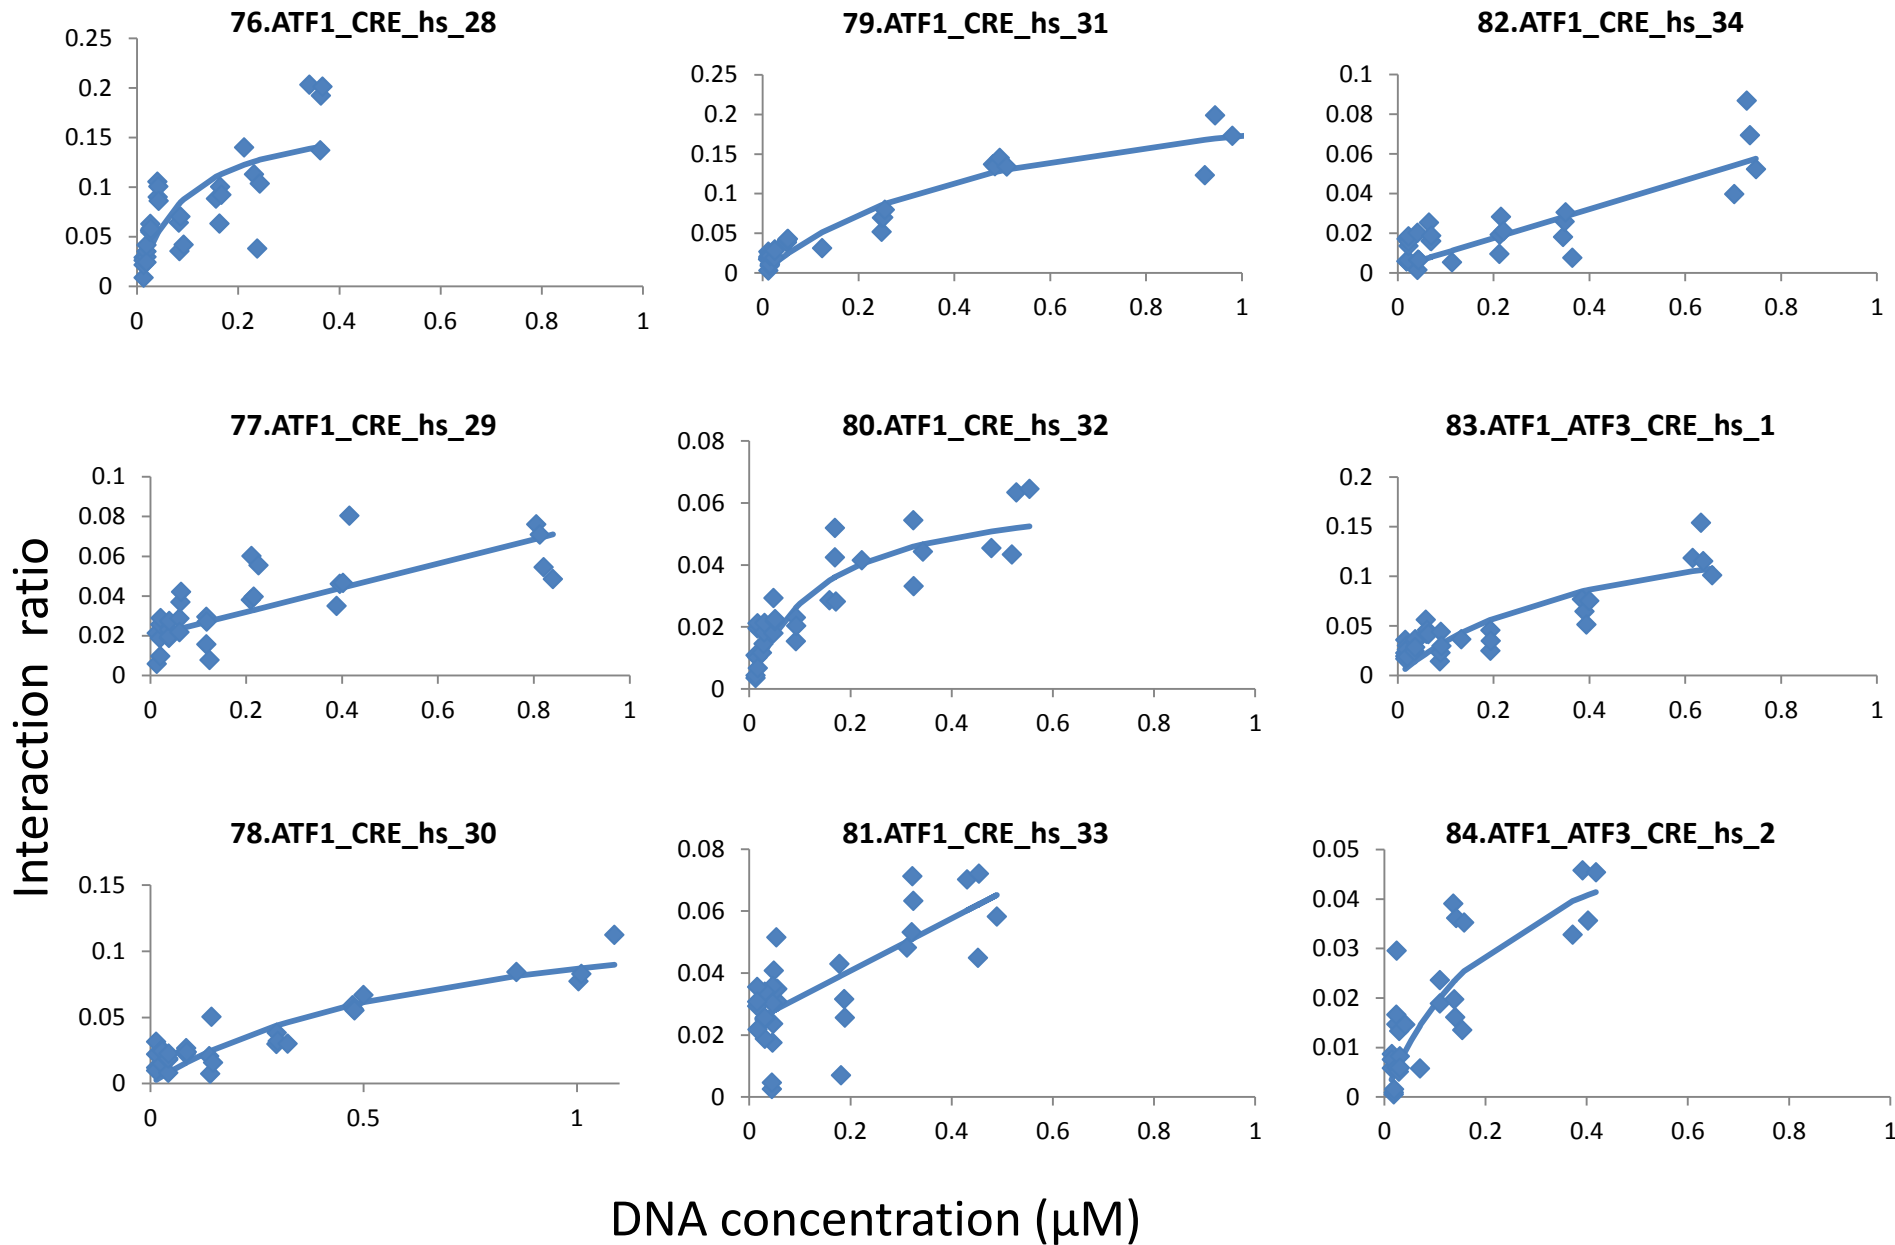

Interaction ratio

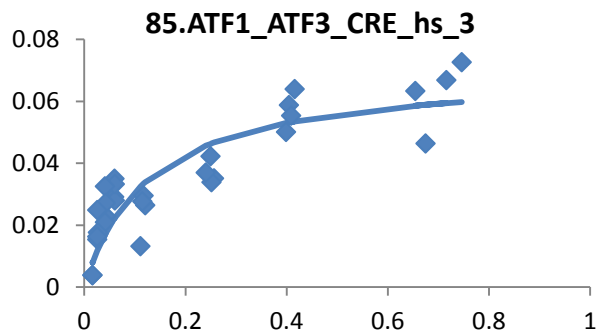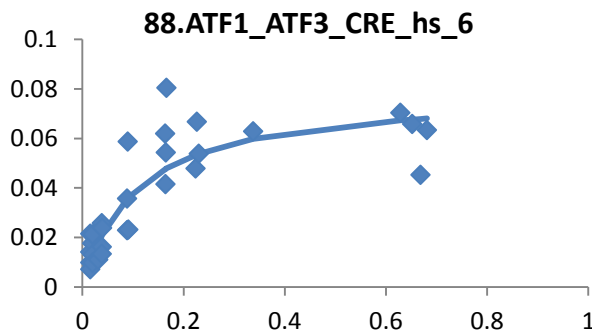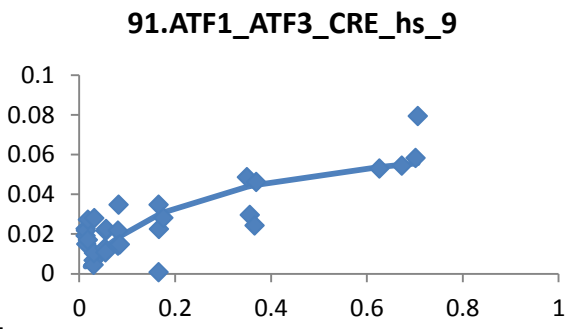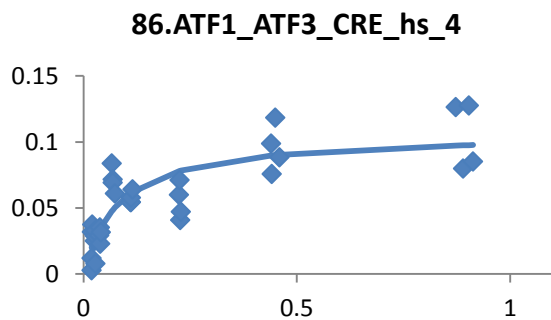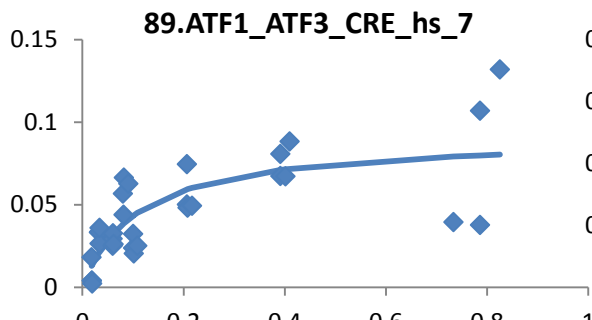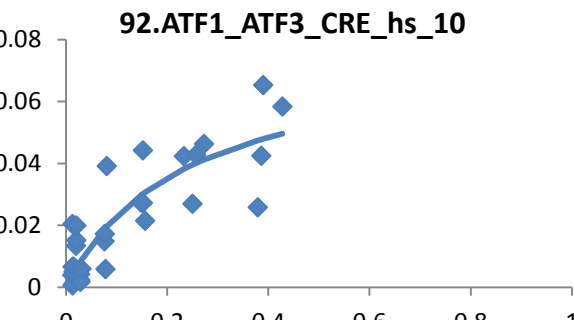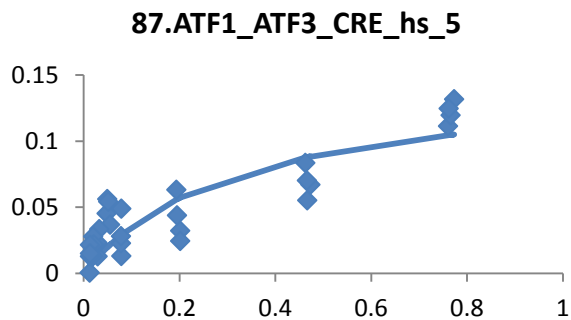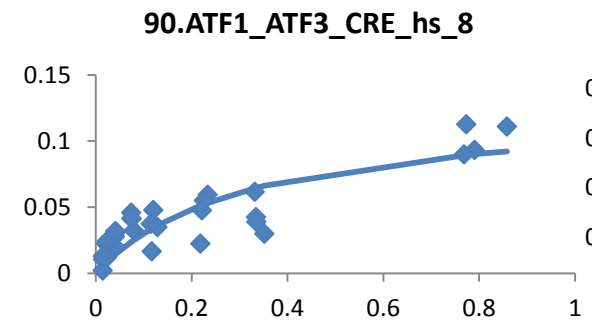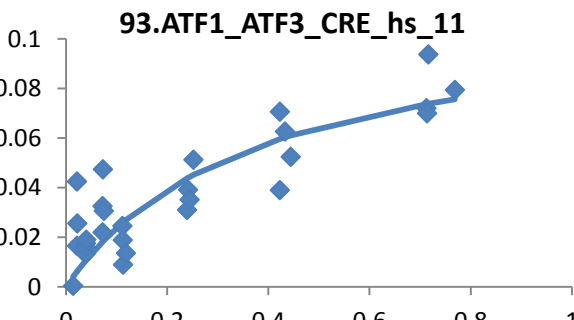

DNA concentration ( $\mu\text{M}$ )

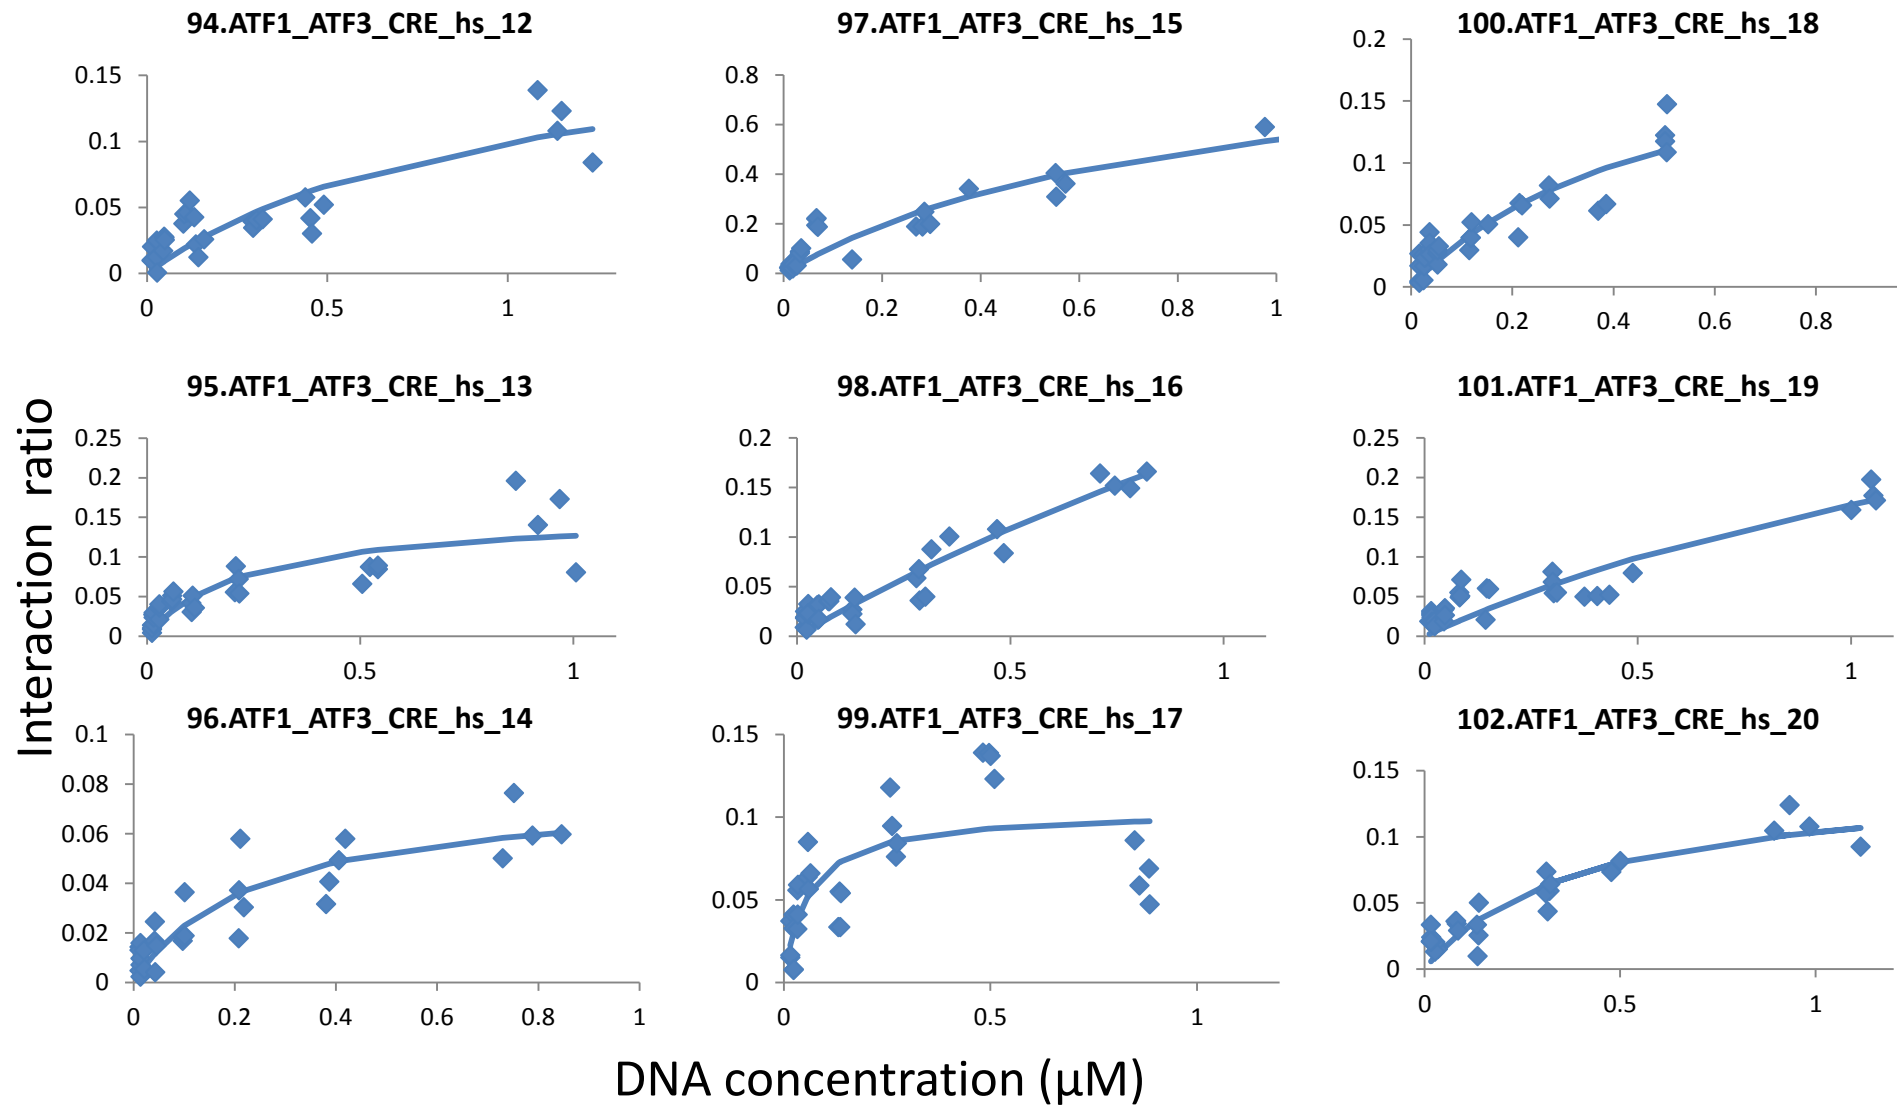

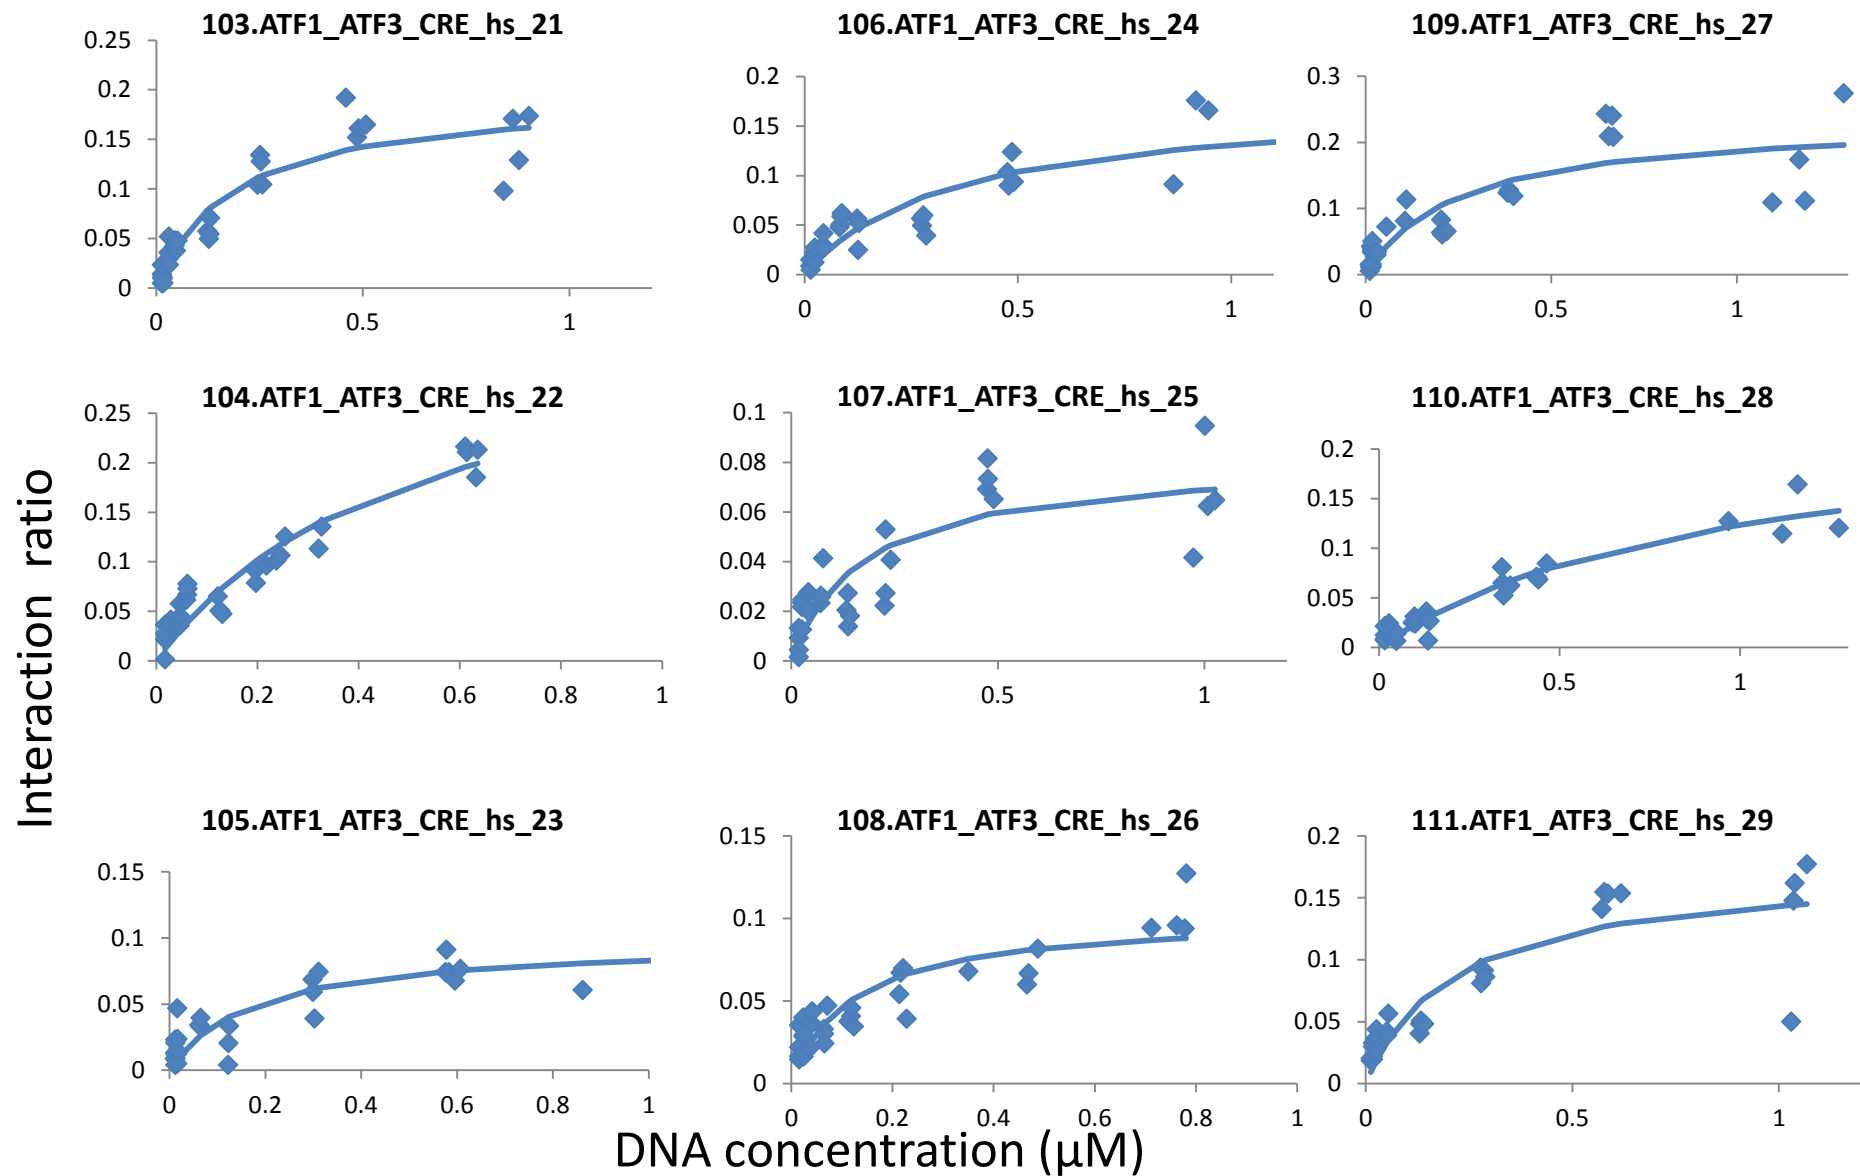



Interaction ratio

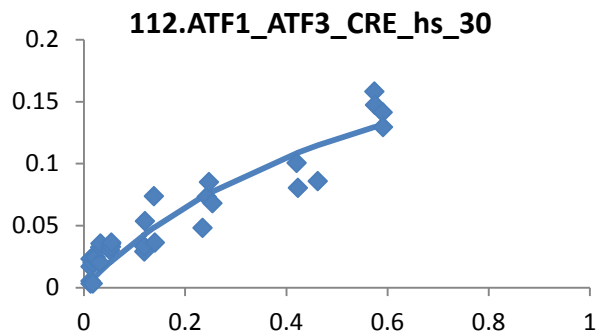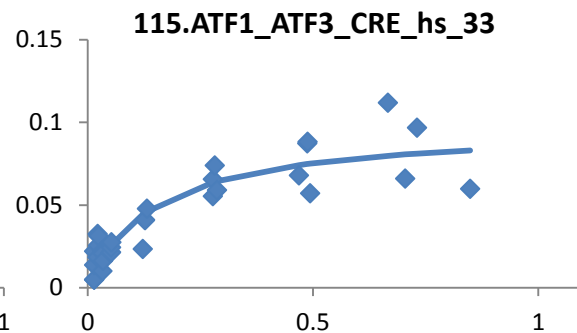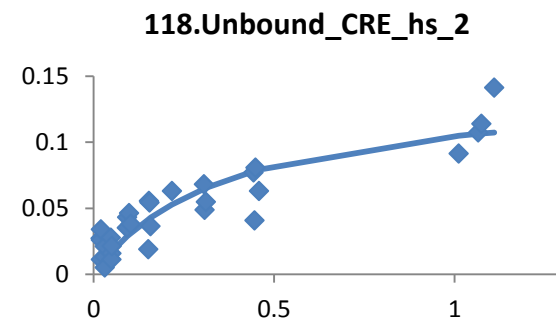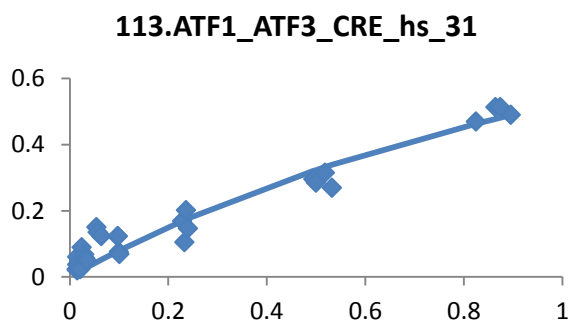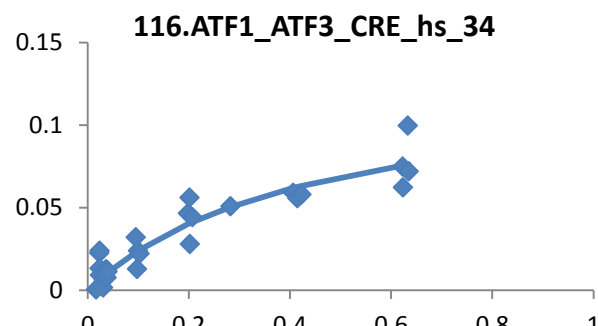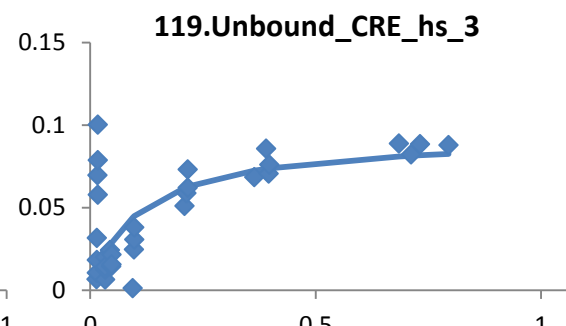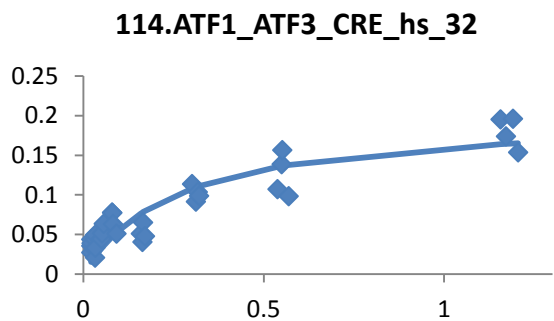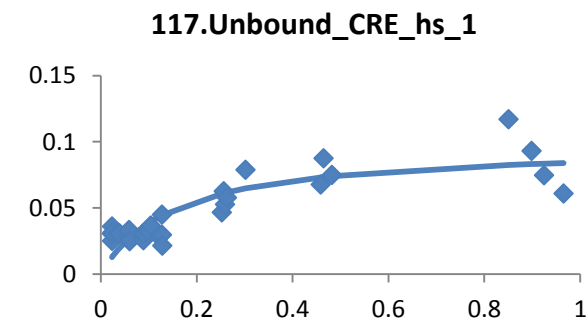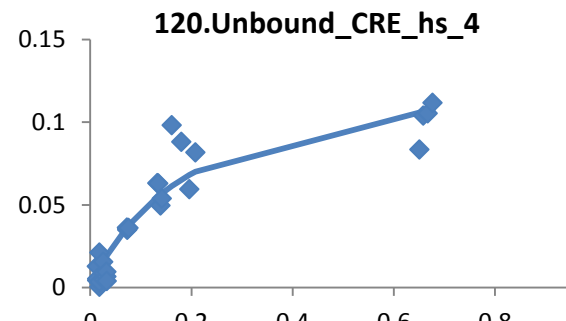

DNA concentration ( $\mu\text{M}$ )

Interaction ratio

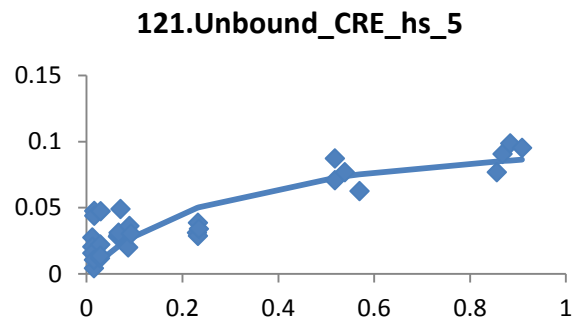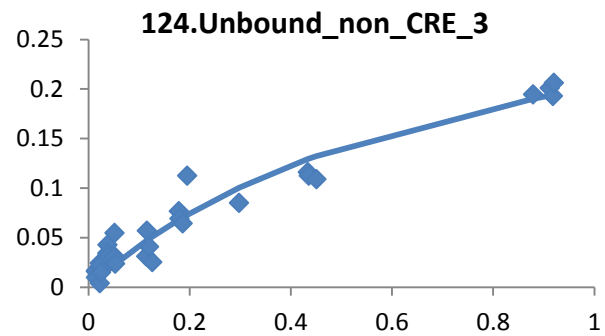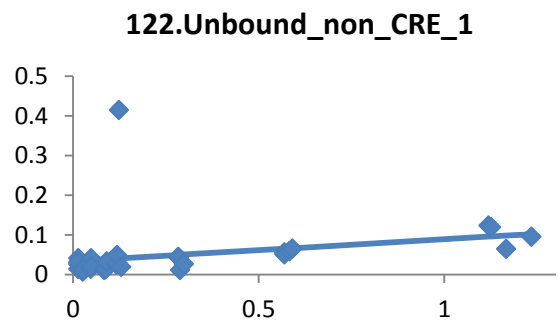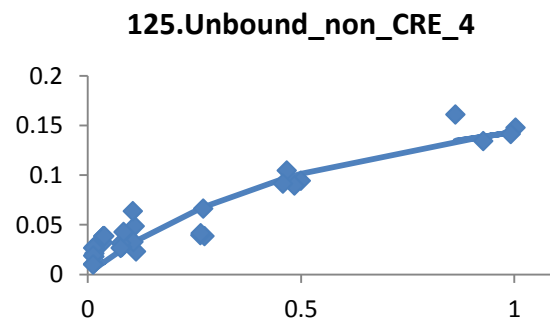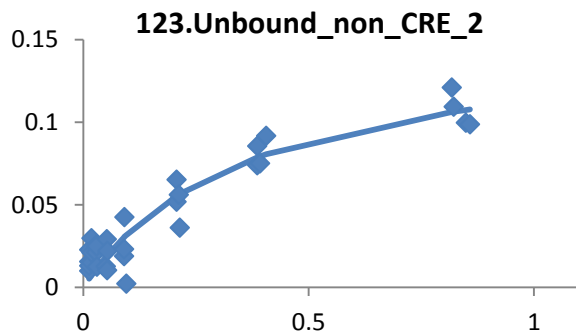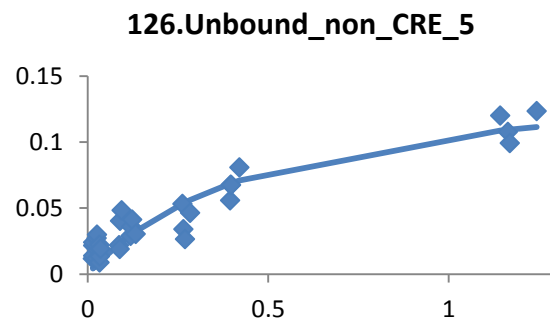

DNA concentration ( $\mu\text{M}$ )

Fig. S5

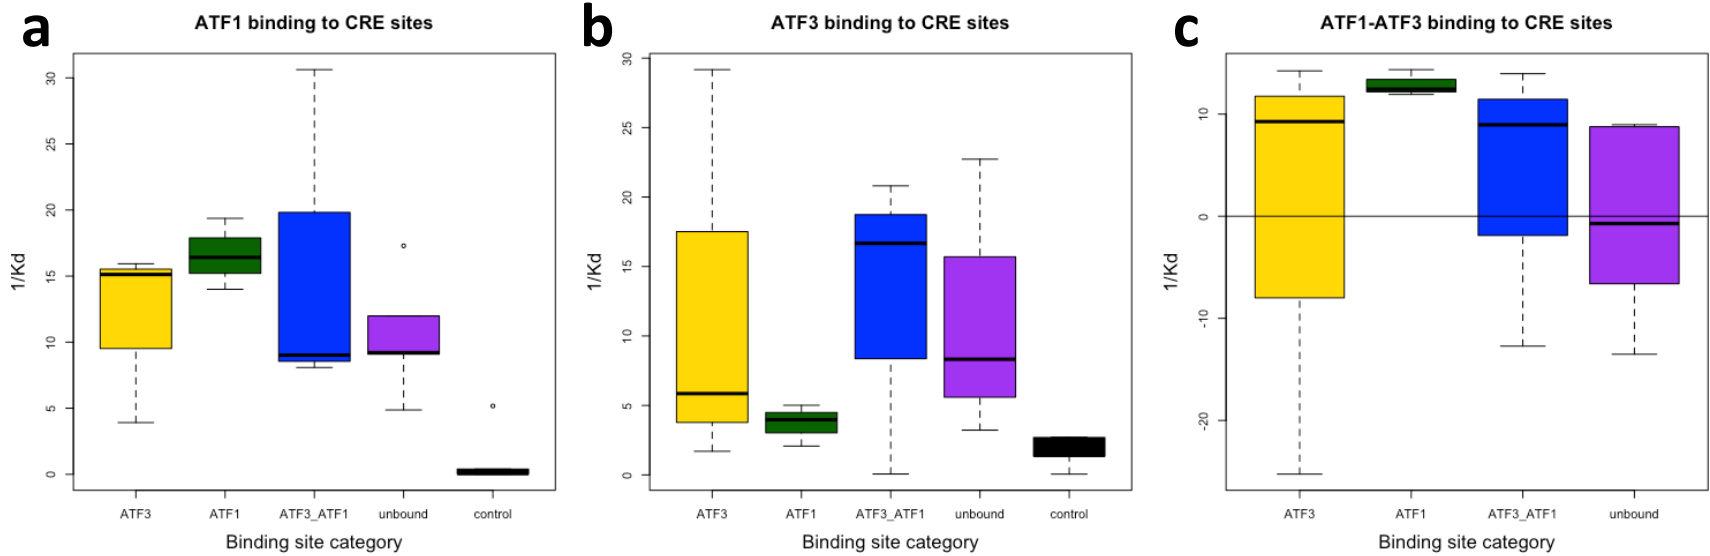

**Figure S5. QPID measurements explain in vivo binding differences between ATF1 and ATF3 to CRE binding sites. (a&b)** Boxplots of affinity constants (1/Kd) in different BS categories. ATF1 and ATF3 have higher affinities to sites they bind uniquely than to sites bound by the other protein, unbound and controls. **(c)** Boxplots of affinity constant (1/Kd) differences between Atf1 and Atf3 in different BS categories. ATF1 has higher affinity in sites it binds uniquely than sites bound by ATF3.

# Table. S1

|                                       |         |         |                                |         |         |
|---------------------------------------|---------|---------|--------------------------------|---------|---------|
| PBM file: ATF1_v1_deBruijn.txt        |         |         | PBM file: ATF1_v2_deBruijn.txt |         |         |
| 1647 binding sites                    |         |         | 1619 binding sites             |         |         |
|                                       | oligo 5 | oligo 6 |                                | oligo 5 | oligo 6 |
| HeIT                                  | 1.691   | 1.733   | HeIT                           | 1.688   | 1.724   |
| MGW                                   | 0.384   | 0.296   | MGW                            | 0.380   | 0.297   |
| ProT                                  | 2.967   | 2.567   | ProT                           | 3.010   | 2.604   |
| Roll                                  | 4.723   | 3.333   | Roll                           | 4.728   | 3.336   |
|                                       |         |         |                                |         |         |
| ChIP-seq file:                        |         |         | ChIP-seq file:                 |         |         |
| wgEncodeAwgTfbsSydhK562Atf106325UniPk |         |         | K562_ATF1_narrowPeak.bed.txt   |         |         |
| 4310 binding sites                    |         |         | 7545 binding sites             |         |         |
|                                       | oligo 5 | oligo 6 |                                | oligo 5 | oligo 6 |
| HeIT                                  | 1.516   | 1.375   | HeIT                           | 1.502   | 1.381   |
| MGW                                   | 0.472   | 0.284   | MGW                            | 0.465   | 0.295   |
| ProT                                  | 3.704   | 2.107   | ProT                           | 3.586   | 2.243   |
| Roll                                  | 2.723   | 2.225   | Roll                           | 2.728   | 2.235   |

**Table S1 - Normalized Euclidean distance of oligo 5 and 6 to average shape features of PBM and ChIP-seq experiments.** Local DNA shape features were predicted for oligo 5 and 6. Average local DNA shape features were predicted for PBM and ChIP-seq binding sites. The Euclidean distances were calculated between the shape features vectors of oligo 5 and 6 and the averages. Each distance was normalized by the square root of the length of the vector.
